# Supplementary material
Source: PubMed Central journal article supplement (PMC6778213)
Supplement: pnas.1907787116.sapp.pdf [file pnas.1907787116.sapp.pdf]

**Supplementary Information for:**

**Microbiome composition shapes rapid genomic adaptation of *Drosophila melanogaster***

Seth M. Rudman \*, Sharon Greenblum, Rachel C. Hughes, Subhash Rajpurohit, Ozan Kiratli, Dallin B. Lowder, Skyler G. Lemmon , Dmitri A. Petrov, John M. Chaston, and Paul Schmidt

**Corresponding author: Seth M Rudman**

**Email: [srudman@sas.upenn.edu](mailto:srudman@sas.upenn.edu)**

**This PDF includes:**

**Tables S1 to S5**

**Figures S1 to S9**

**SI references**

**Other supplementary materials for this manuscript include the following:**

**Dataset S1**

**Table S1.** List of sites that show significant divergence between *At* and *Lb* cages in the experiment (effect size >2% and FDR <.05). Table shows: the chromosome arm, position, reference allele, alternate allele, gene name, p-value for divergence between *At* and *Lb* treatments, average allele frequency in: founder, *No-Ad*, *At*, and *Lb* populations, p-value for divergence across clinal populations, and GO terms.

**\*Table is attached at the end of this document.**

**Table S2.** Enrichment of *At-Lb* divergence among sites strongly linked to large cosmopolitan inversions (inversion markers), and enrichment of *At-Lb* divergence and clinal concordance among sites within inversions. In each case, the number of sites tested, and their average *At-Lb* divergence score is indicated, as well as a non-parametric p-value indicating the percent of times (of 1,000 trials) that a random subset of sites of equivalent size had an equal or higher average divergence score (divergence.p). For sites within inversions, the concordance rate between the identity of the allele associated with experimentally-treated and natural clinal populations enriched for the same microbial taxa is also indicated, as well as a similar non-parametric p-value.

| inversion   | chrom | start    | stop     | inversion markers |                  |              | inversion sites |                  |             |              |               |
|-------------|-------|----------|----------|-------------------|------------------|--------------|-----------------|------------------|-------------|--------------|---------------|
|             |       |          |          | count             | At-Lb divergence | divergence.p | count           | At-Lb divergence | concordance | divergence.p | concordance.p |
| In(2L)t     | 2L    | 2225744  | 13154180 | 15                | 0.479968203      | 0.282        | 279394          | 0.426852075      | 0.502912646 | 0.363        | 0.512         |
| In(2R)Ns    | 2R    | 11278659 | 16163839 | 62                | 0.48336471       | 0.147        | 105545          | 0.427194496      | 0.474853585 | 0.397        | 0.896         |
| In(3L)P     | 3L    | 3173046  | 16301941 | 3                 | 0.242628985      | 0.747        | 290383          | 0.42137602       | 0.502076249 | 0.501        | 0.503         |
| In(3R)C     | 3R    | 1.60E+07 | 2.60E+07 | 20                | 0.547489936      | 0.08         | 205344          | 0.419489051      | 0.519170927 | 0.56         | 0.182         |
| In(3R)K     | 3R    | 7576289  | 21966092 | 1                 | 0.975097587      | 0.11         | 275032          | 0.417266525      | 0.52398069  | 0.588        | 0.136         |
| In(3R)Mo    | 3R    | 17232639 | 24857019 | 137               | 0.451377244      | 0.187        | 153064          | 0.415534453      | 0.520780672 | 0.638        | 0.181         |
| In(3R)Payne | 3R    | 12257931 | 20569732 | 15                | 0.291547042      | 0.902        | 168293          | 0.419605227      | 0.53104362  | 0.519        | 0.08          |

**Table S3.** List of sites that show divergence between *At* and *Lb* cages in the experiment (effect size >2% and p-value <.05) and that show the most pronounced variation along a cline in eastern North America (clinality FDR<10<sup>-8</sup>). Of these 35 sites, 80% show concordance in the direction of allele change between experimental replicates enriched for AAB and populations that have a higher proportion of AAB in the microbiome.

Table shows: the chromosome arm, position, reference allele, alternate allele, gene name, p-value for divergence between *At* and *Lb* treatments, p-value for divergence across clinal populations, concordance between the allele associated with experimental populations and natural populations enriched for the same microbial taxa, average allele frequency in founder, *No-Ad*, *At*, and *Lb*, populations, and GO terms. Gene names for SNPs outside genic regions are in parenthesis and indicate the closest gene for gene-counting purposes.

**\*Table is attached at the end of this document.**

**Table S4:** Results of each filtering step for SNPs. All reads were first mapped to the *Drosophila melanogaster* reference genome (v5.39) using bwa (v0.7.9). To identify potential human contaminant reads (potentially due to index switching), all reads were also mapped to the human genome, using bbmap (1), with parameters suggested at <https://jgi.doe.gov/data-and-tools/bbtools/bb-tools-user-guide/bbmap-guide/> for removing contaminant reads while minimizing false positives (minratio=0.9 maxindel=3 bwr=0.16 bw=12 fast minhits=2 qtrim=r trimq=10 untrim idtag printunmappedcount kfilter=25 maxsites=1 k=14) and a version of human reference genome hg19 masked for repeat short kmers, low entropy windows, and regions highly conserved across species (freely available at <https://drive.google.com/file/d/0B3llHR93L14wd0pSSnFULUlhcUk/edit?usp=sharing>). Reads that mapped to the human genome were marked as putative contaminants and were removed from the analysis, as well as any SNP sites in the *D. melanogaster* genome to which contaminant reads mapped (103 out of 3168422 sites; denoted in the ‘HumanReads’ column). As our samples were sequenced in two separate batches, we excluded any SNPs that showed distinct allele frequency ranges in the two batches (‘BatchEffects’). We also excluded any sites with <1% minor allele frequency in either founder sample (‘NoStandingVariation’), any SNPs within repeat regions as defined by UCSC RepeatMasker (2) (‘RepeatRegions’), SNPs with read depth <50x in any sample (‘LowReadDepth’), and SNPs where neither the major nor minor allele matched the reference allele (‘NoRef’).

| Chrom | Unfiltered | HumanReads | BatchEffects | NoStandingVariation | RepeatRegions | LowReadDepth | NoRef | RemainingSites |
|-------|------------|------------|--------------|---------------------|---------------|--------------|-------|----------------|
| 2L    | 720529     | 42         | 53           | 162636              | 45099         | 27127        | 57    | 485515         |
| 2R    | 620103     | 8          | 5            | 139941              | 72090         | 21976        | 53    | 386030         |
| 3L    | 722693     | 21         | 39           | 175514              | 70033         | 27070        | 49    | 449967         |
| 3R    | 670679     | 9          | 25           | 160405              | 21529         | 20390        | 46    | 468275         |
| X     | 434418     | 23         | 53           | 118842              | 48200         | 68223        | 11    | 199066         |
| all   | 3168422    | 103        | 175          | 757338              | 256951        | 164786       | 216   | 1988853        |

**Table S5:** Test for overlap between sets of SNPs found to be divergent between pairs of experimental treatments and SNPs that show significant seasonal changes in wild *D. melanogaster* populations ('flipped model' (3)). Tests for enrichment were conducted at a range of significance thresholds. Columns shown also list: the number of divergent sites between experimental treatments, the number of sites that vary significantly across season, the number of sites that show significant divergence between treatments and vary seasonally, the number of sites expected to show significant divergence between treatments and vary seasonally by chance alone, and the p-value from a hypergeometric test for the enrichment of *At-Lb* divergent sites among seasonally varying sites. Divergence was assessed between experimental populations and with respect to the founding population. *No-Ad* comparisons were done on randomly selected groups of 3 cages to match *At* and *Lb* replication.

| treatments      | enrichment of divergent sites among seasonal sites |            |            |        |                |          |
|-----------------|----------------------------------------------------|------------|------------|--------|----------------|----------|
|                 | threshold                                          | divergedCt | seasonalCt | bothCt | bothCtExpected | p        |
| Founder_NoAd    | 0.1                                                | 128455     | 212388     | 19867  | 19875          | 5.28E-01 |
|                 | 0.05                                               | 63683      | 123724     | 5765   | 5740           | 3.63E-01 |
|                 | 0.01                                               | 12462      | 35496      | 312    | 322            | 7.27E-01 |
|                 | 0.005                                              | 6182       | 20738      | 93     | 93             | 5.31E-01 |
|                 | 0.001                                              | 1268       | 6012       | 9      | 6              | 1.10E-01 |
| Founder_Aceto   | 0.1                                                | 134090     | 212388     | 20600  | 20747          | 8.80E-01 |
|                 | 0.05                                               | 65094      | 123724     | 5920   | 5867           | 2.31E-01 |
|                 | 0.01                                               | 11749      | 35496      | 334    | 304            | 4.31E-02 |
|                 | 0.005                                              | 5688       | 20738      | 112    | 86             | 3.67E-03 |
|                 | 0.001                                              | 1042       | 6012       | 9      | 5              | 4.29E-02 |
| Founder_Lacto   | 0.1                                                | 133352     | 212388     | 20934  | 20633          | 8.39E-03 |
|                 | 0.05                                               | 64208      | 123724     | 5823   | 5787           | 3.09E-01 |
|                 | 0.01                                               | 11646      | 35496      | 332    | 301            | 3.92E-02 |
|                 | 0.005                                              | 5639       | 20738      | 102    | 85             | 4.01E-02 |
|                 | 0.001                                              | 1041       | 6012       | 12     | 5              | 2.59E-03 |
| NoAd_Aceto      | 0.1                                                | 129385     | 212388     | 19797  | 20019          | 9.64E-01 |
|                 | 0.05                                               | 64252      | 123724     | 5675   | 5791           | 9.51E-01 |
|                 | 0.01                                               | 12425      | 35496      | 313    | 321            | 6.89E-01 |
|                 | 0.005                                              | 6112       | 20738      | 80     | 92             | 9.14E-01 |
|                 | 0.001                                              | 1253       | 6012       | 6      | 5              | 4.69E-01 |
| NoAd_Lacto      | 0.1                                                | 130203     | 212388     | 20249  | 20146          | 2.04E-01 |
|                 | 0.05                                               | 64375      | 123724     | 5838   | 5802           | 3.10E-01 |
|                 | 0.01                                               | 12449      | 35496      | 307    | 322            | 8.09E-01 |
|                 | 0.005                                              | 6197       | 20738      | 77     | 94             | 9.66E-01 |
|                 | 0.001                                              | 1216       | 6012       | 9      | 5              | 9.09E-02 |
| Aceto_Lacto     | 0.1                                                | 124559     | 212388     | 19520  | 19272          | 2.13E-02 |
|                 | 0.05                                               | 60518      | 123724     | 5599   | 5455           | 1.87E-02 |
|                 | 0.01                                               | 11855      | 35496      | 345    | 307            | 1.49E-02 |
|                 | 0.005                                              | 5959       | 20738      | 108    | 90             | 3.43E-02 |
|                 | 0.001                                              | 1268       | 6012       | 6      | 6              | 4.80E-01 |
| NoAd123_NoAd456 | 0.1                                                | 121309     | 212388     | 18911  | 18770          | 1.21E-01 |
|                 | 0.05                                               | 58250      | 123724     | 5378   | 5250           | 3.03E-02 |
|                 | 0.01                                               | 10870      | 35496      | 288    | 281            | 3.46E-01 |
|                 | 0.005                                              | 5384       | 20738      | 84     | 81             | 3.98E-01 |
|                 | 0.001                                              | 1028       | 6012       | 6      | 5              | 2.97E-01 |
| NoAd136_NoAd278 | 0.1                                                | 126416     | 212388     | 19029  | 19560          | 1.00E+00 |
|                 | 0.05                                               | 61370      | 123724     | 5265   | 5531           | 1.00E+00 |
|                 | 0.01                                               | 11821      | 35496      | 298    | 306            | 6.80E-01 |
|                 | 0.005                                              | 5808       | 20738      | 78     | 88             | 8.66E-01 |
|                 | 0.001                                              | 1134       | 6012       | 4      | 5              | 7.31E-01 |
| NoAd248_NoAd356 | 0.1                                                | 117051     | 212388     | 17883  | 18111          | 9.73E-01 |
|                 | 0.05                                               | 56312      | 123724     | 4964   | 5076           | 9.54E-01 |
|                 | 0.01                                               | 10491      | 35496      | 269    | 271            | 5.65E-01 |
|                 | 0.005                                              | 5129       | 20738      | 77     | 77             | 5.38E-01 |
|                 | 0.001                                              | 1022       | 6012       | 1      | 4              | 9.89E-01 |

**Figure S1:** Beta-diversity analysis of microbial communities based on 16S rRNA gene sequencing of whole-body flies collected at week 1 and week 4 of the experiment using Bray-Curtis, weighted Unifrac, and unweighted Unifrac distance metrics. At each time point, five replicate samples of five flies were collected from each cage, the flies were homogenized, and the homogenate was stored at -80°C until a 16S rRNA gene library was prepared. Libraries were sequenced paired-end with 250 bp reads on a Illumina HiSeq. Distance matrices were created using standard QIIME2 parameters. PERMANOVAs were calculated in R using the vegan package.

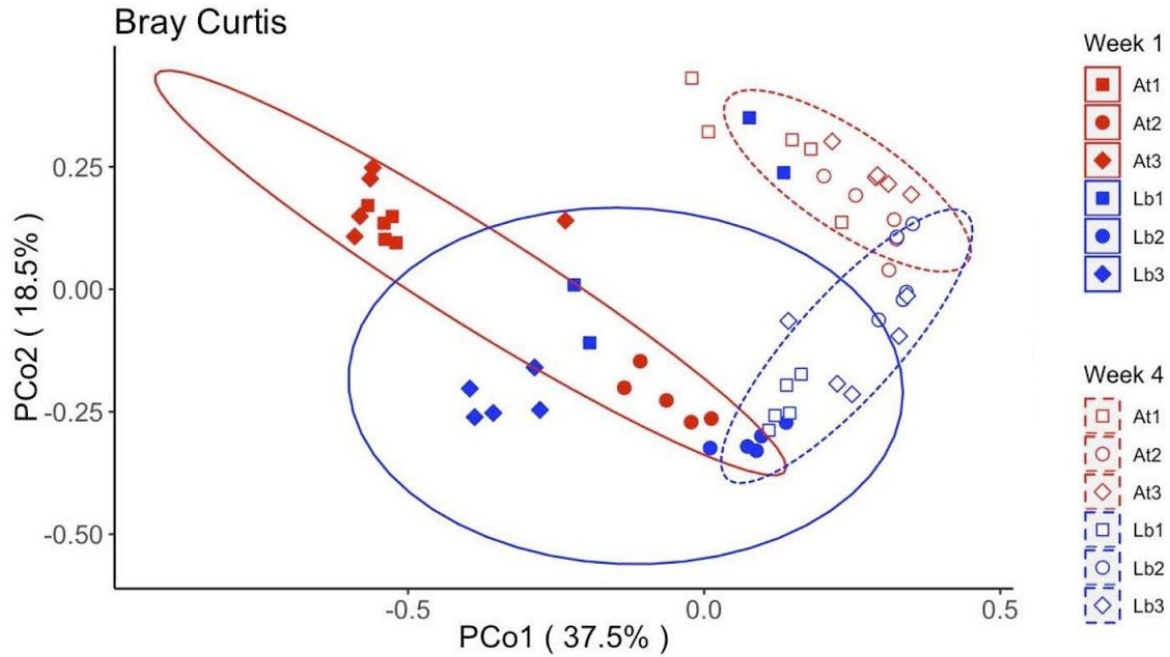

**All data**

|                            | Df | SumsOfSqs | MeanSqs | F.Model | R2   | Pr(>F) |
|----------------------------|----|-----------|---------|---------|------|--------|
| <i>treatment</i>           | 1  | 1.73      | 1.73    | 25.3    | 0.13 | 0      |
| <i>date</i>                | 1  | 3.68      | 3.68    | 53.72   | 0.27 | 0      |
| <i>treatment:cage</i>      | 4  | 2.16      | 0.54    | 7.89    | 0.16 | 0      |
| <i>treatment:date</i>      | 1  | 0.86      | 0.86    | 12.53   | 0.06 | 0      |
| <i>treatment:cage:date</i> | 4  | 2.1       | 0.52    | 7.65    | 0.15 | 0      |
| <i>Residuals</i>           | 47 | 3.22      | 0.07    | NA      | 0.23 | NA     |
| <i>Total</i>               | 58 | 13.76     | NA      | NA      | 1    | NA     |

**Week 1 only**

|                       | Df | SumsOfSqs | MeanSqs | F.Model | R2   | Pr(>F) |
|-----------------------|----|-----------|---------|---------|------|--------|
| <i>treatment</i>      | 1  | 1.57      | 1.57    | 16.38   | 0.21 | 0      |
| <i>treatment:cage</i> | 4  | 3.58      | 0.89    | 9.34    | 0.49 | 0      |
| <i>Residuals</i>      | 23 | 2.2       | 0.1     | NA      | 0.3  | NA     |
| <i>Total</i>          | 28 | 7.35      | NA      | NA      | 1    | NA     |

**Week 4 only**

|                       | Df | SumsOfSqs | MeanSqs | F.Model | R2   | Pr(>F) |
|-----------------------|----|-----------|---------|---------|------|--------|
| <i>treatment</i>      | 1  | 0.99      | 0.99    | 22.96   | 0.36 | 0      |
| <i>treatment:cage</i> | 4  | 0.72      | 0.18    | 4.16    | 0.26 | 0      |
| <i>Residuals</i>      | 24 | 1.04      | 0.04    | NA      | 0.38 | NA     |
| <i>Total</i>          | 29 | 2.76      | NA      | NA      | 1    | NA     |



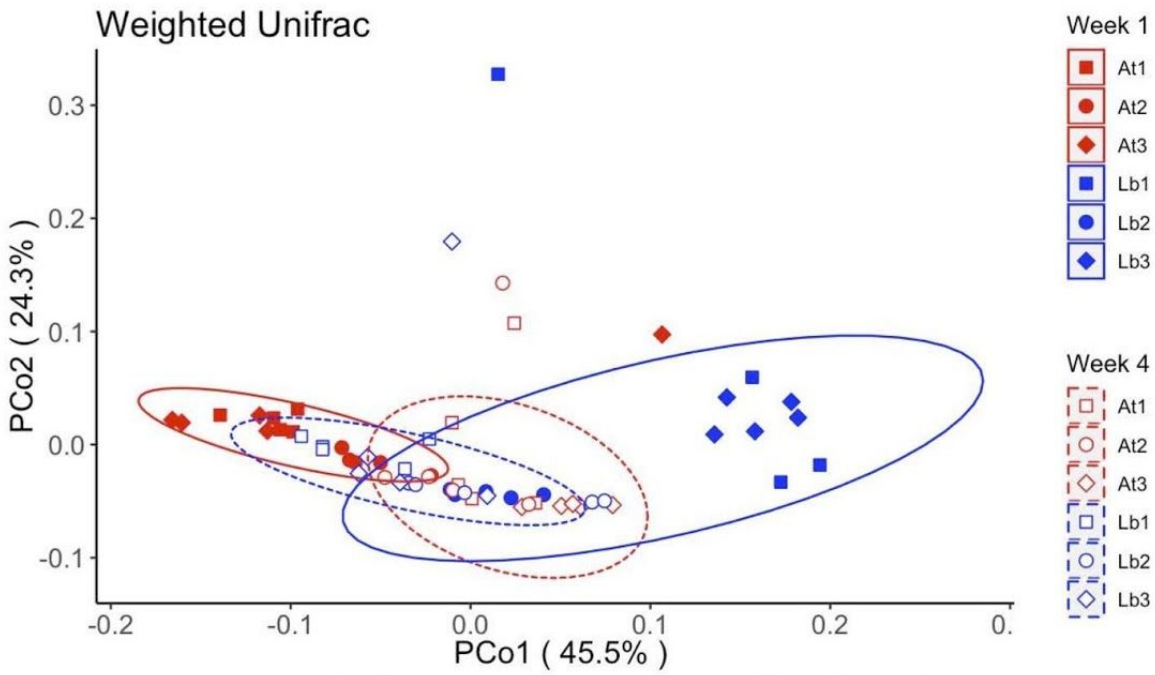

|                            | Df | SumsOfSqs | MeanSqs | F.Model | R2   | Pr(>F) |
|----------------------------|----|-----------|---------|---------|------|--------|
| <i>treatment</i>           | 1  | 0.07      | 0.07    | 8.42    | 0.08 | 0      |
| <i>date</i>                | 1  | 0.06      | 0.06    | 7.26    | 0.07 | 0      |
| <i>treatment:cage</i>      | 4  | 0.08      | 0.02    | 2.33    | 0.08 | 0.01   |
| <i>treatment:date</i>      | 1  | 0.21      | 0.21    | 24.33   | 0.22 | 0      |
| <i>treatment:cage:date</i> | 4  | 0.12      | 0.03    | 3.62    | 0.13 | 0      |
| <i>Residuals</i>           | 47 | 0.4       | 0.01    | NA      | 0.42 | NA     |
| <i>Total</i>               | 58 | 0.94      | NA      | NA      | 1    | NA     |

|                       | Df | SumsOfSqs | MeanSqs | F.Model | R2   | Pr(>F) |
|-----------------------|----|-----------|---------|---------|------|--------|
| <i>treatment</i>      | 1  | 0.25      | 0.25    | 21.21   | 0.37 | 0      |
| <i>treatment:cage</i> | 4  | 0.15      | 0.04    | 3.2     | 0.22 | 0      |
| <i>Residuals</i>      | 23 | 0.27      | 0.01    | NA      | 0.4  | NA     |
| <i>Total</i>          | 28 | 0.67      | NA      | NA      | 1    | NA     |

|                       | Df | SumsOfSqs | MeanSqs | F.Model | R2   | Pr(>F) |
|-----------------------|----|-----------|---------|---------|------|--------|
| <i>treatment</i>      | 1  | 0.03      | 0.03    | 4.87    | 0.12 | 0.01   |
| <i>treatment:cage</i> | 4  | 0.05      | 0.01    | 2.53    | 0.26 | 0.02   |
| <i>Residuals</i>      | 24 | 0.12      | 0.01    | NA      | 0.62 | NA     |
| <i>Total</i>          | 29 | 0.2       | NA      | NA      | 1    | NA     |

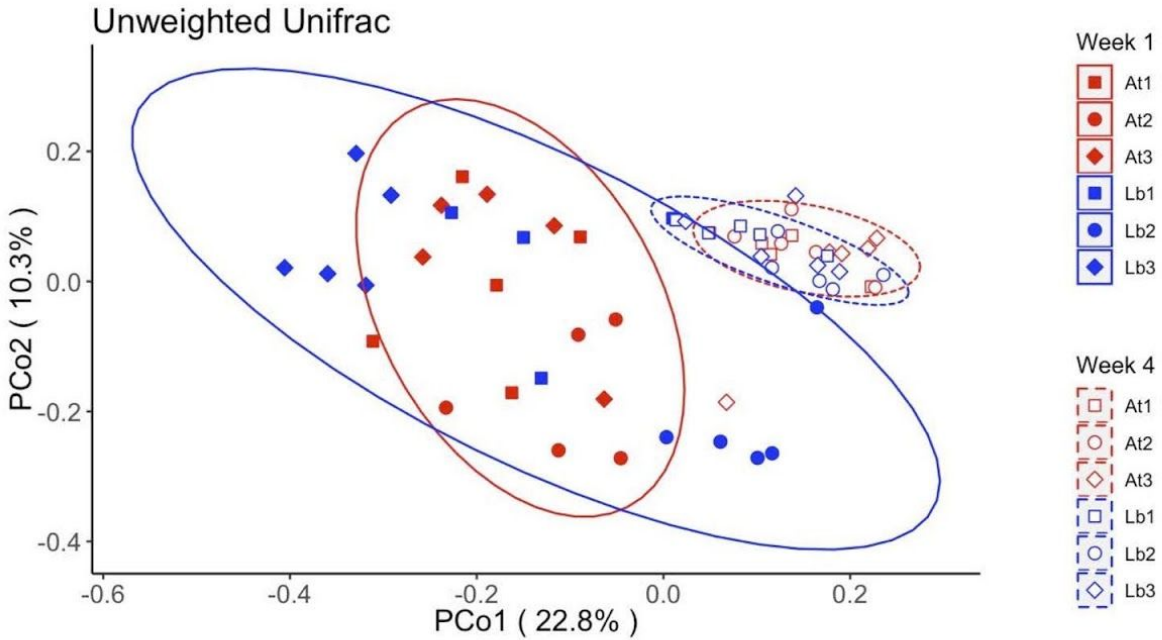

|                            | Df | SumsOfSqs | MeanSqs | F.Model | R2   | Pr(>F) |
|----------------------------|----|-----------|---------|---------|------|--------|
| <i>treatment</i>           | 1  | 0.18      | 0.18    | 1.94    | 0.02 | 0.03   |
| <i>date</i>                | 1  | 1.3       | 1.3     | 13.8    | 0.16 | 0      |
| <i>treatment:cage</i>      | 4  | 1.02      | 0.26    | 2.71    | 0.13 | 0      |
| <i>treatment:date</i>      | 1  | 0.24      | 0.24    | 2.5     | 0.03 | 0.01   |
| <i>treatment:cage:date</i> | 4  | 0.82      | 0.2     | 2.16    | 0.1  | 0      |
| <i>Residuals</i>           | 47 | 4.44      | 0.09    | NA      | 0.55 | NA     |
| <i>Total</i>               | 58 | 8         | NA      | NA      | 1    | NA     |

|                       | Df | SumsOfSqs | MeanSqs | F.Model | R2   | Pr(>F) |
|-----------------------|----|-----------|---------|---------|------|--------|
| <i>treatment</i>      | 1  | 0.36      | 0.36    | 2.25    | 0.07 | 0      |
| <i>treatment:cage</i> | 4  | 1.21      | 0.3     | 1.87    | 0.23 | 0      |
| <i>Residuals</i>      | 23 | 3.74      | 0.16    | NA      | 0.7  | NA     |
| <i>Total</i>          | 28 | 5.31      | NA      | NA      | 1    | NA     |

|                       | Df | SumsOfSqs | MeanSqs | F.Model | R2   | Pr(>F) |
|-----------------------|----|-----------|---------|---------|------|--------|
| <i>treatment</i>      | 1  | 0.09      | 0.09    | 2.16    | 0.06 | 0.03   |
| <i>treatment:cage</i> | 4  | 0.38      | 0.09    | 2.23    | 0.25 | 0      |
| <i>Residuals</i>      | 24 | 1.02      | 0.04    | NA      | 0.68 | NA     |
| <i>Total</i>          | 29 | 1.49      | NA      | NA      | 1    | NA     |

**Figure S2:** Absolute abundance of CFUs in *D. melanogaster* from outdoor enclosures. Pools of 5 male flies were collected from outdoor enclosures, homogenized in 125 ul phosphate-buffered saline (PBS), and dilution plated on modified de Man-Rogosa-Sharpe medium. Colony forming units (CFUs) were counted on plates after 1-3 days, and normalized to CFU per fly: AAB were copper or tan-colored, while LAB were yellow or white. Values are shown as a mean of all pools, which were collected from each of 3 separate experiments (usually 5 pools per cage per sampling time, exact N shown in caption). For each of three metrics - AAB abundance, LAB abundance, and AAB+LAB abundance - pairwise comparisons between absolute CFU abundances were determined by a Dunn test {`dunn.test`} and shown by compact letter displays over the bars {`rcompanion`}. LAB, AAB, and LAB+AAB abundances are shown within the blue bars, within the red bars, and outside of the bars, respectively. If no letters are shown there were no significant differences. The Kruskal-Wallis test statistic (KW), degrees of freedom (df), and p-values (p) for each comparison are reported. All statistics were calculated in R.

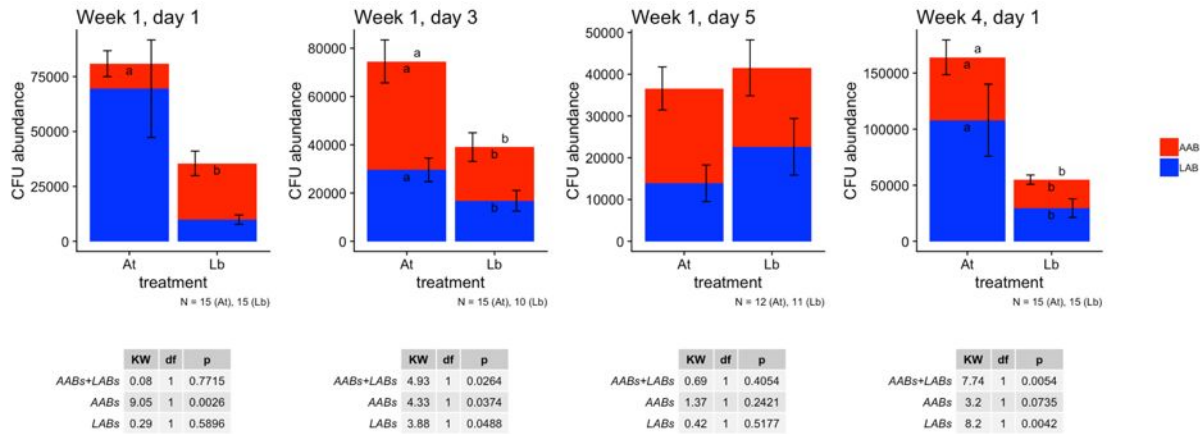

**Figure S3:** Microbiome composition of homogenized adult flies based on 16S sequence data. Individual bars represent cage-collected pools composed of 5 males with 5 replicate pools sequenced for each cage. Graphs show relative abundance of each microbiome group for each pool (5 from each cage) after 1 week of treatment and 4 weeks of treatment. Flies were sampled from throughout the experimental cages with care taken not to sample flies directly on media.

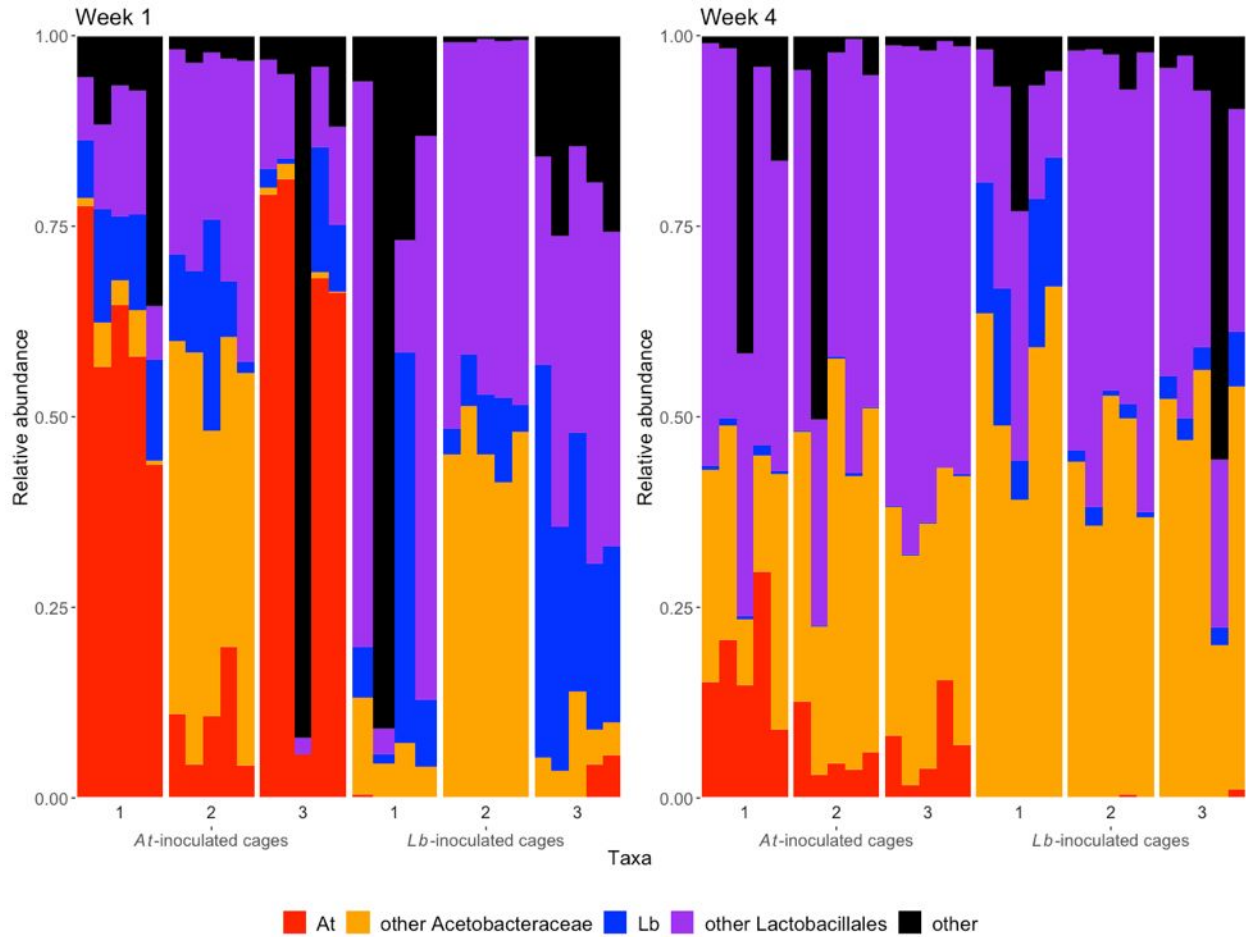

**Figure S4:** OTUs where we detected significant differences in abundance between microbiome treatments or within treatments over time as determined by ANCOM with the most stringent correction for multiple tests. Significant differences with treatment and/or time were subsequently confirmed by a mixed effects model with a binomial family and are shown as compact letter displays (different letters represent significant differences between conditions). Most OTUs could not be classified to the species level and are named according to the lowest taxonomic assignment.

Each panel shows the relative abundance of a specific OTU as a percentage of total the microbiome community in the *At* and *Lb* experimental treatments at week 1 and week 4 of the experiment. Bars are shaded based on taxonomic assignments and represent the mean  $\pm$  SE.

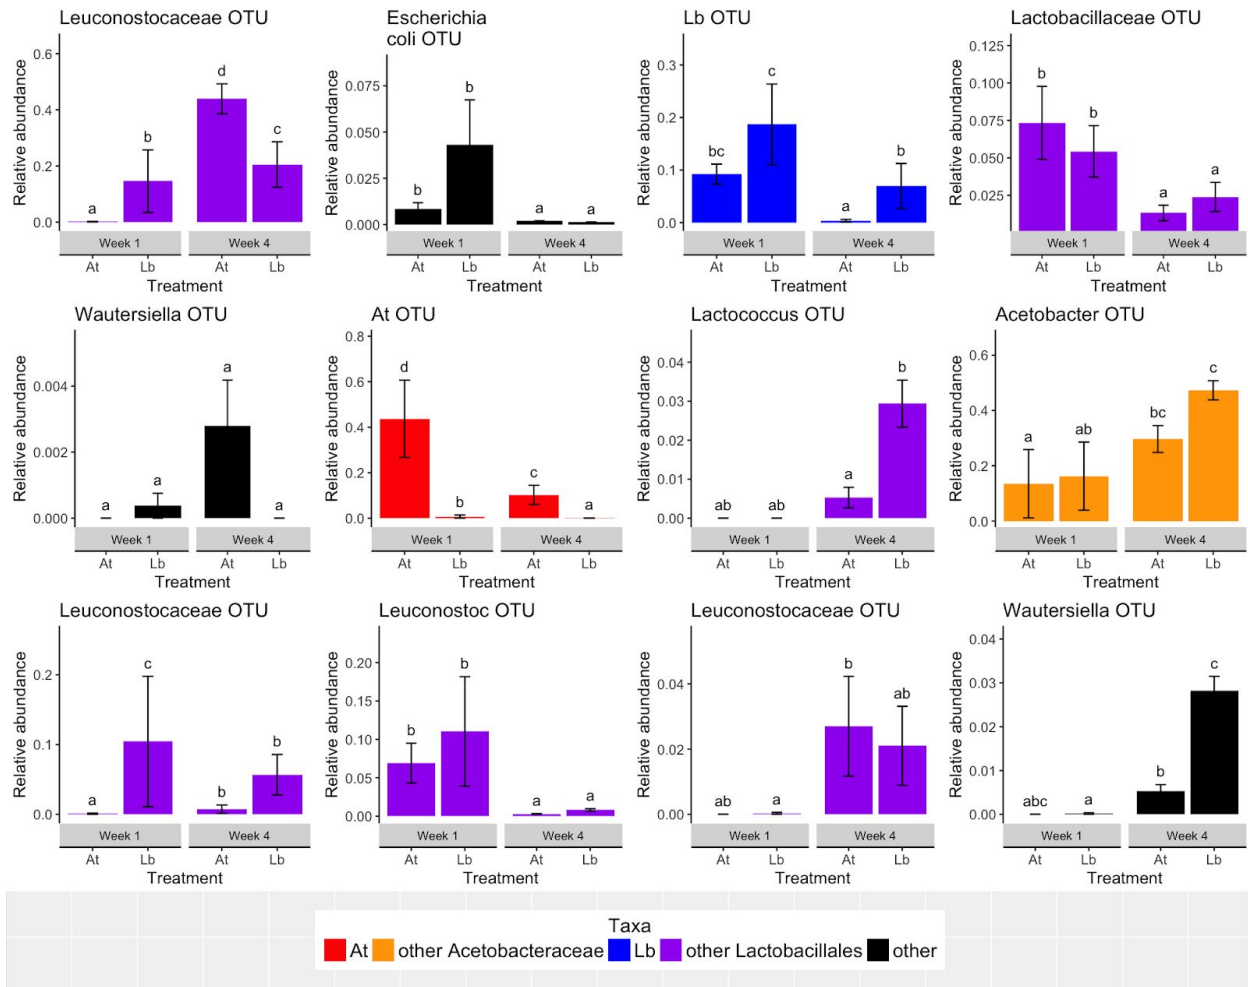

**Figure S5.** Taxonomic identity of randomly selected bacterial colonies isolated from whole body homogenates of caged *D. melanogaster*. For each of the *At* and *Lb* treatments, 10 AAB-like (copper-colored) and 10 LAB-like (white or yellow colored) colonies were randomly selected, streaked for isolation, and genome sequenced. Genomic libraries were prepared using 800 $\mu$ L of bacteria culture, which was centrifuged at 15,000 x g for 10 minutes. Pellets were resuspended in 600 $\mu$ L of lysis buffer, and the 600 $\mu$ L volume was extracted and quantified. In order to fragment the extracted DNA, 1.5 $\mu$ g of DNA was diluted in 2 $\mu$ L fragmentase buffer. 2 $\mu$ L NEB fragmentase was added and each sample was incubated at 37C to digest the fragments to approximately 500 bp (incubation times were optimized to the batch of fragmentase). Enzyme activity was halted after incubation using 10 $\mu$ L (0.25M) EDTA. DNA was cleaned using Zymo DNA Clean and Concentrator 25 columns. For end repair, 50 $\mu$ L fragmented DNA was mixed with 3 $\mu$ L NEB enzyme mix, 7 $\mu$ L NEB end prep reaction buffer, and placed in a thermocycler for 30 minutes each for 20C and 65 C. This reaction was combined with 30 $\mu$ L NEB ligation master mix, 1 $\mu$ L ligation enhancer, and 2.5 $\mu$ L of a unique illumina adapter and then ligated at 20C for 15 minutes. Fragment size selection was done using Ampure SPRI beads (SPB). The bead stock was diluted in a ratio of 109.25 $\mu$ L SPB to 74.75 $\mu$ L ddH<sub>2</sub>O. 160ul diluted SPB were added to 100 ul of end repaired sample, and incubated at 25°C for 5 minutes. The bead-separated supernatant was mixed with 30 ul of SPB stock and the supernatant was discarded. Samples were washed twice with 200ul 80% EtOH, resuspended in 22.5 ul RSB for 5 min, and 17.5 ul was transferred to an ALP plate. Barcode ligation was enriched with the KAPA Library Amplification kit according to manufacturer instructions, size selection was repeated, libraries normalized to 5ng/uL via Qubit, and sequenced by 2x125 bp sequencing on an Illumina HiSeq 2500 at the BYU DNA sequencing center.

Genome sequences were assembled using Velvet 1.2.10 as described previously (Newell, 2014). Briefly, the nucleotide coverage of each of the raw assemblies was determined based on the size of the expected genome (*A. tropicalis* DmCs\_006 or *L. brevis* DmCs\_002), assembled into contigs across a kmer range of 85-123, adjusted for expected coverage and coverage cutoff, and a single assembly that minimized node number while maximizing n50 value and total genome size was selected manually. When sequence reads provided greater than 200X nucleotide coverage, the raw reads were split evenly into subsets providing 101-200X coverage, and each subset was assembled as described above except that there were no adjustments for expected coverage and coverage cutoff. The contigs file from the multiple sub-assemblies for each genome were used to create a final assembly.

The similarity of each of these genomes was compared in an all against all mummer comparison that included the reference genomes for *A. tropicalis* DmCs\_006 or *L. brevis* DmCs\_002. Genomes were clustered according to a 99.9% or greater M-to-M score. Taxonomic identity of the representative sequence for each cluster, picked as the assembly with the fewest contigs, was assigned using JSpecies.

**Taxonomic identities of bacterial isolates recovered from evolving flies.** A pool of five male flies from a randomly-selected cage that had been inoculated with either *At* or *Lb* was collected,

homogenized, and plated on mMRS. From each pool, ten AAB-like colonies and ten LAB-like colonies were cultured in isolation and subjected to whole genome sequencing. Whole genome nucleotide similarity of the strains was determined by ANIm, with different isolates assigned at ANIM>99.9%. The results show that strains identical to the inoculated *At* strain could be recovered from the treatment flies, confirming that the treatment bacteria were colonizing the flies.

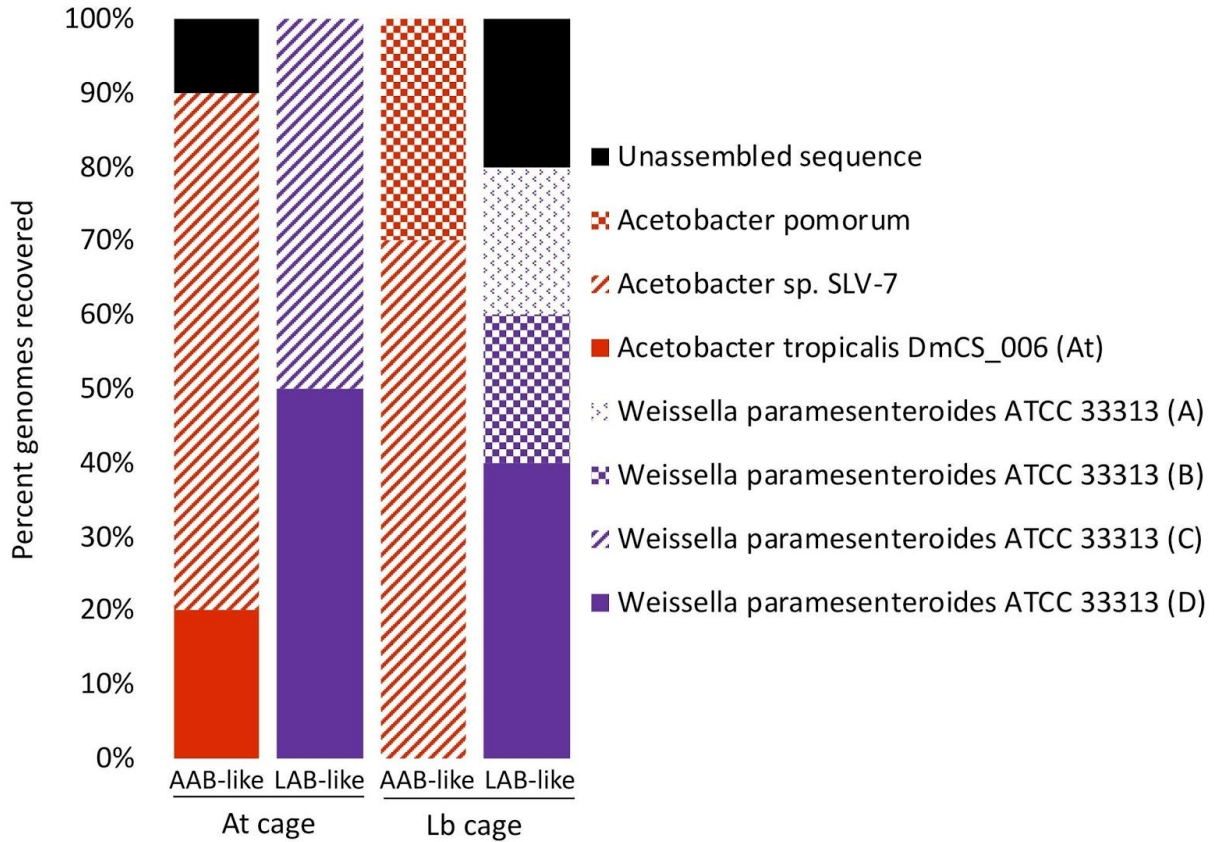

**Figure S6.** Influence of the microbiome treatments on *Wolbachia* abundance. For this figure *Wolbachia* reads in the 16S rRNA marker gene analysis were retained, the number of reads per sample was rarefied to 1250, and the correlation between AAB:LAB ratios in this dataset (panel A) and the CFU counts was defined as significant by a Spearman's rank test. Then, the absolute abundance of *Wolbachia* in the 16S dataset was estimated from the relative abundance of *Wolbachia* and AAB in the 16S and the absolute abundance of AAB from the CFU counts (panel B). Significant differences in the abundance of *Wolbachia* with treatment and date were defined by a Kruskal-Wallis test, with a Dunn test for post hoc multiple comparisons. Different letters over the groups of cages represent significant differences in the abundance of *Wolbachia*.  $R_s$  = Spearman's rank statistic,  $\rho$  = correlation coefficient,  $p$  = p-value, KW  $\chi^2$  = Kruskal-Wallis chi-square statistic.

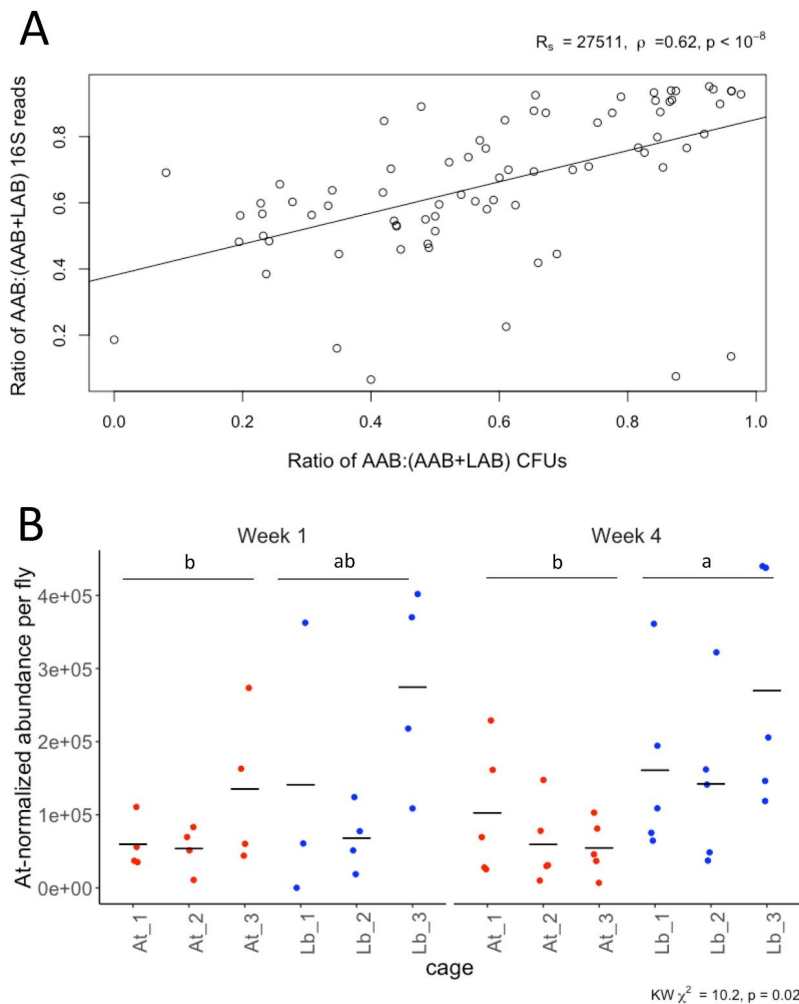



**Fig S7:** The influence of *At* and *Lb* on *D. melanogaster* larval development rate. This figure shows the difference in larval development rate of the outbred population of *D. melanogaster* used to found all experimental cages when mono-associated with *Lb* or *At* bacteria. Consistent with previous work, bacterial treatment significantly influenced larval development time; *At* led to ~10% higher development rate than *Lb* ( $Z=-15.9$ ,  $P<0.001$ ).

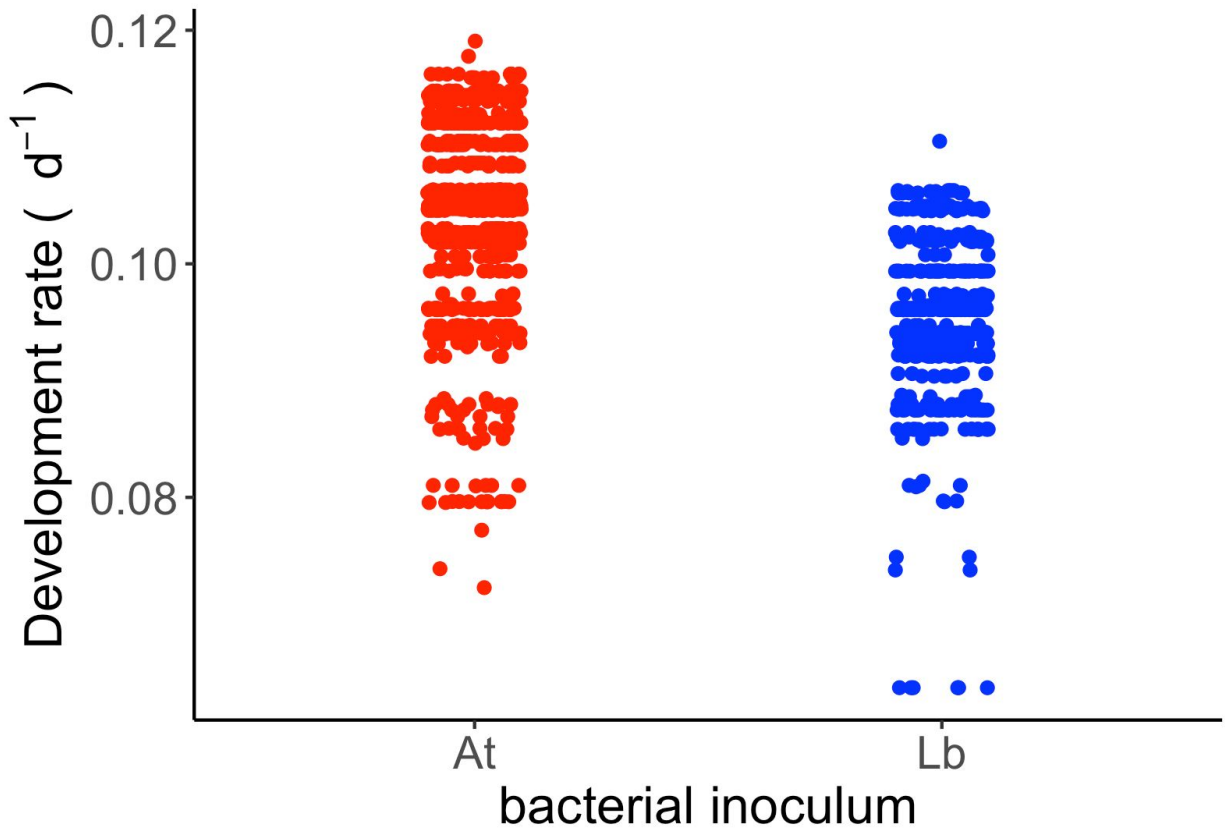

**Fig S8:** Average  $F_{st}$  between the founder population and each treatment for 1,000 subsets of 1,000 segregating sites. In each of the 1,000 rounds, 1,000 sites were randomly selected from across the genome and  $F_{st}$  was calculated at each site between the average allele frequency in the two founder samples and allele frequencies averaged within treatment groups. For the *No-Ad* treatment, a random sample of 3 replicate *No-Ad* populations was chosen for each site subset to match the number of *At* and *Lb* replicates.

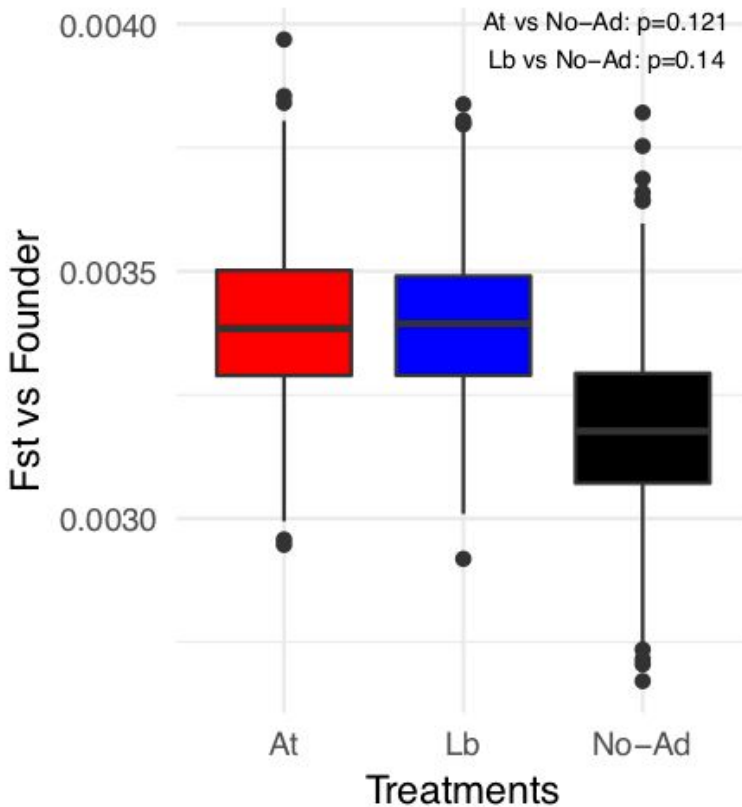

**Figure S9:** We used allele frequencies at each segregating site for each sample to conduct a principal component analysis using the R function *prcomp* with *scale=TRUE*, and the first two PCs were plotted to examine genome-wide divergence across samples visually. 'Founder' represent sub-samples of the initial population used to found each replicate and were sampled at Day 0. All outdoor treatment cages were sampled at Day 45. Experimental cages and founding populations are colored by treatment.

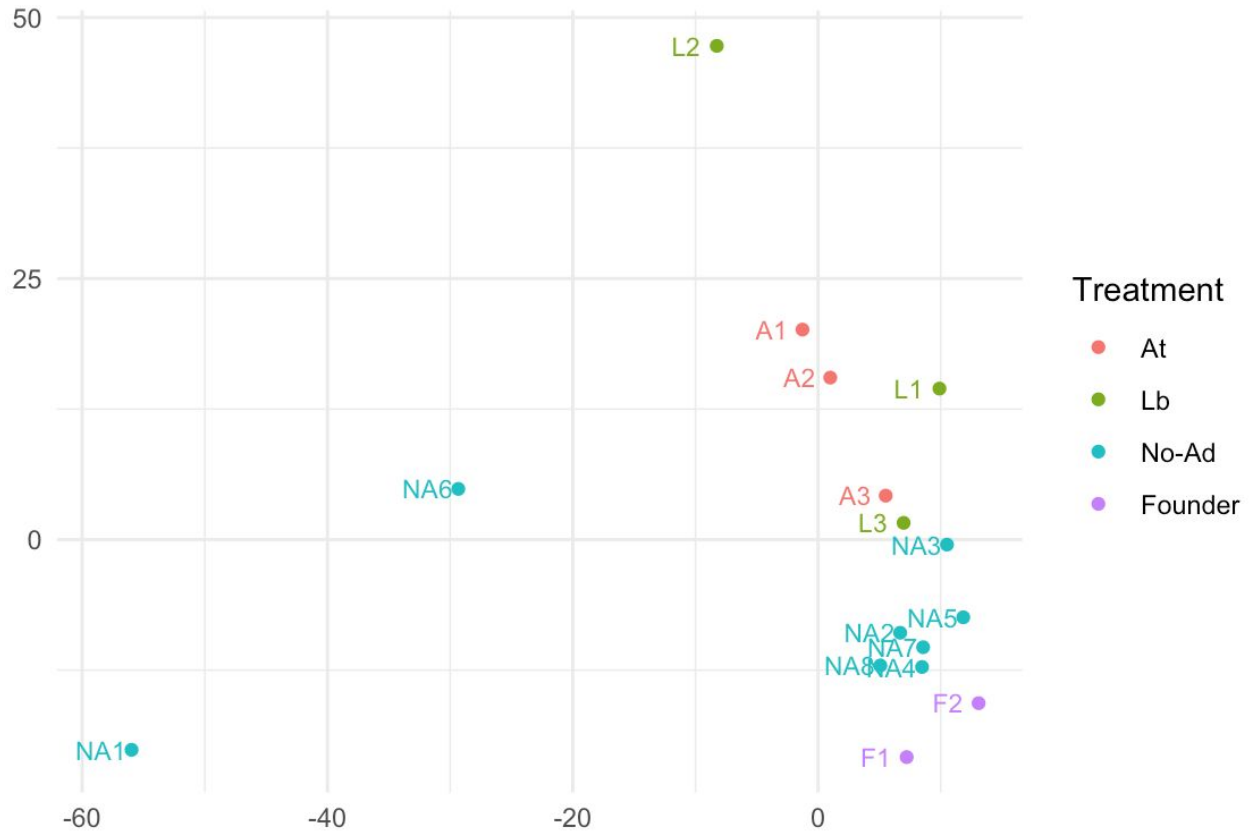

1. Bushnell B (2014) *BBMap: A Fast, Accurate, Splice-Aware Aligner* (Lawrence Berkeley National Lab. (LBNL), Berkeley, CA (United States)) Available at: <https://www.osti.gov/biblio/1241166-bbmap-fast-accurate-splice-aware-aligner> [Accessed July 10, 2019].
2. Kuhn RM, Haussler D, Kent WJ (2013) The UCSC genome browser and associated tools. *Brief Bioinform* 14(2):144–161.
3. Machado H, et al. (2018) Broad geographic sampling reveals predictable and pervasive seasonal adaptation in *Drosophila*. *bioRxiv*:337543.

| chrM | pos     | ref | alt | gene          | p.At-<br>Lb_div | afMean  |        |        | p.clinality | GOterm   |                                                                                                                                                                                                                                                                                                                           |
|------|---------|-----|-----|---------------|-----------------|---------|--------|--------|-------------|----------|---------------------------------------------------------------------------------------------------------------------------------------------------------------------------------------------------------------------------------------------------------------------------------------------------------------------------|
|      |         |     |     |               |                 | .Founde | afMean | afMean |             |          |                                                                                                                                                                                                                                                                                                                           |
| 2L   | 409409  | A   | G   | alpha-Adaptin | 4.65E-06        | 0.222   | 0.281  | 0.306  | 0.219       | 2.58E-01 | protein transporter activity;clathrin adaptor activity;endocytosis;mitotic cleavage furrow ingression;ovarian follicle cell development;positive regulation of autophagy                                                                                                                                                  |
| 2L   | 469463  | C   | A   | (MED15)       | 7.30E-05        | 0.124   | 0.142  | 0.121  | 0.068       | 1.11E-01 | NA                                                                                                                                                                                                                                                                                                                        |
| 2L   | 1101026 | C   | G   | CG4629        | 1.40E-05        | 0.442   | 0.416  | 0.285  | 0.471       | 6.94E-01 | protein serine/threonine kinase activity;ATP binding;protein phosphorylation;cell adhesion;regulation of cell shape                                                                                                                                                                                                       |
| 2L   | 1674858 | C   | T   | chimmo        | 5.48E-05        | 0.228   | 0.191  | 0.151  | 0.245       | 2.25E-01 | DNA-binding transcription factor activity;imaginal disc-derived wing morphogenesis;mushroom body development;metal ion binding;dendrite morphogenesis                                                                                                                                                                     |
| 2L   | 1998051 | T   | A   | CG33543       | 1.61E-05        | 0.248   | 0.233  | 0.257  | 0.220       | 8.28E-05 | cell adhesion;membrane store-operated calcium entry;sensory perception of chemical stimulus                                                                                                                                                                                                                               |
| 2L   | 2087653 | A   | G   | dpr3          | 6.96E-05        | 0.412   | 0.434  | 0.463  | 0.299       | 1.67E-01 | stimulus                                                                                                                                                                                                                                                                                                                  |
| 2L   | 2334084 | A   | G   | CG9967        | 2.69E-05        | 0.270   | 0.225  | 0.184  | 0.276       | 7.93E-01 | NA                                                                                                                                                                                                                                                                                                                        |
| 2L   | 2669544 | T   | A   | (Gr23a)       | 4.15E-05        | 0.110   | 0.074  | 0.057  | 0.161       | 1.84E-01 | NA                                                                                                                                                                                                                                                                                                                        |
| 2L   | 3433591 | T   | G   | (pgant2)      | 6.77E-05        | 0.088   | 0.100  | 0.076  | 0.136       | 5.67E-01 | NA                                                                                                                                                                                                                                                                                                                        |
| 2L   | 3852967 | A   | C   | (slp2)        | 9.60E-05        | 0.563   | 0.543  | 0.632  | 0.478       | 6.96E-01 | NA                                                                                                                                                                                                                                                                                                                        |
| 2L   | 4132809 | A   | T   | (Sr)          | 1.50E-04        | 0.043   | 0.063  | 0.034  | 0.091       | 9.99E-01 | NA                                                                                                                                                                                                                                                                                                                        |
| 2L   | 4313991 | T   | A   | tut1          | 1.15E-04        | 0.020   | 0.057  | 0.025  | 0.046       | 6.49E-01 | axon guidance;axonal defasciculation;peripheral nervous system development;flight behavior;mechanosensory behavior;synaptic target recognition;adult locomotory behavior;axon midline choice point recognition;larval behavior;lateral inhibition;regulation of dendrite morphogenesis;dendrite self-avoidance            |
| 2L   | 4814724 | T   | A   | CG15629       | 8.35E-05        | 0.116   | 0.119  | 0.150  | 0.080       | 3.63E-01 | metabolic process;oxidoreductase activity regulation of antimicrobial peptide biosynthetic process;G protein-coupled receptor activity;G protein-coupled receptor signaling pathway;G protein-coupled glutamate receptor signaling pathway;germ-band extension;glutamate receptor activity;integral component of membrane |
| 2L   | 4867676 | A   | G   | pog           | 4.54E-06        | 0.212   | 0.269  | 0.205  | 0.300       | 1.92E-01 | activity;integral component of membrane                                                                                                                                                                                                                                                                                   |

|    |         |   |   |            |          |       |       |       |       |          |                                                                                                                                                                                                                                                                                                                                                                                                                                                                                                                                                   |
|----|---------|---|---|------------|----------|-------|-------|-------|-------|----------|---------------------------------------------------------------------------------------------------------------------------------------------------------------------------------------------------------------------------------------------------------------------------------------------------------------------------------------------------------------------------------------------------------------------------------------------------------------------------------------------------------------------------------------------------|
| 2L | 5347750 | G | C | nompc      | 1.24E-04 | 0.076 | 0.068 | 0.091 | 0.063 | 6.43E-01 | startle response;ion channel activity;cation channel activity;calcium channel activity;cillum;cation transport;calcium ion transport;sensory perception of sound;mechanosensory behavior;cytoskeletal protein binding;mechanosensitive ion channel activity;response to auditory stimulus;dendrite;ankyrin binding;cation channel complex;locomotion;neuronal cell body;sensory perception of mechanical stimulus;detection of mechanical stimulus involved in sensory perception;sensory perception of touch;calcium ion transmembrane transport |
| 2L | 5870688 | A | G | CG8965     | 2.21E-06 | 0.075 | 0.072 | 0.025 | 0.080 | 5.65E-02 | protein homodimerization activity; Ras GTPase binding; glial cell development; pristiniv regulation of epidermal growth factor receptor signaling pathway R7 cell development                                                                                                                                                                                                                                                                                                                                                                     |
| 2L | 6256166 | G | A | CG9486     | 1.49E-04 | 0.110 | 0.078 | 0.095 | 0.124 | 4.52E-01 | N-acetyltransferase activity                                                                                                                                                                                                                                                                                                                                                                                                                                                                                                                      |
| 2L | 6499556 | T | C | CG31637    | 8.75E-05 | 0.754 | 0.742 | 0.714 | 0.814 | 7.04E-04 | sulfotransferase activity                                                                                                                                                                                                                                                                                                                                                                                                                                                                                                                         |
| 2L | 6603495 | G | A | (CG11319)  | 9.78E-05 | 0.350 | 0.355 | 0.295 | 0.432 | NA       | NA                                                                                                                                                                                                                                                                                                                                                                                                                                                                                                                                                |
| 2L | 7392478 | T | C | CG5160     | 1.91E-05 | 0.063 | 0.106 | 0.056 | 0.106 | 2.62E-02 | GTPase activity;GTP binding;obsolete GTP catabolic process;small GTPase mediated signal transduction;membrane;neurogenesis                                                                                                                                                                                                                                                                                                                                                                                                                        |
| 2L | 7417601 | G | A | chm        | 1.40E-05 | 0.185 | 0.181 | 0.220 | 0.130 | 6.82E-01 | DNA-binding transcription factor activity;transcription coactivator activity;histone acetyltransferase activity;nucleus;transcription factor binding;zinc ion binding;negative regulation of cell fate specification;H4 histone acetyltransferase activity;sensory organ precursor cell fate determination;gene silencing;chaeta development;negative regulation of transcription                                                                                                                                                                 |
| 2L | 7435458 | T | A | (CG5958)   | 1.26E-04 | 0.116 | 0.105 | 0.162 | 0.097 | 2.19E-01 | NA                                                                                                                                                                                                                                                                                                                                                                                                                                                                                                                                                |
| 2L | 7462699 | G | A | (Gr28b)    | 1.05E-05 | 0.052 | 0.047 | 0.081 | 0.048 | 4.20E-01 | NA                                                                                                                                                                                                                                                                                                                                                                                                                                                                                                                                                |
| 2L | 7638255 | G | T | (Slob)     | 1.14E-04 | 0.140 | 0.158 | 0.116 | 0.207 | NA       | NA                                                                                                                                                                                                                                                                                                                                                                                                                                                                                                                                                |
| 2L | 8211227 | A | T | (Ssb-c31a) | 7.34E-06 | 0.035 | 0.016 | 0.016 | 0.042 | NA       | NA                                                                                                                                                                                                                                                                                                                                                                                                                                                                                                                                                |
| 2L | 8304548 | A | C | Scgalpha   | 7.24E-05 | 0.038 | 0.037 | 0.027 | 0.059 | 9.35E-01 | calcium ion binding;structural constituent of muscle;sarcoglycan complex                                                                                                                                                                                                                                                                                                                                                                                                                                                                          |
| 2L | 8784561 | T | C | (CG9468)   | 3.68E-05 | 0.875 | 0.879 | 0.920 | 0.803 | 3.28E-01 | NA                                                                                                                                                                                                                                                                                                                                                                                                                                                                                                                                                |
| 2L | 9102902 | G | A | (CG31609)  | 8.59E-05 | 0.196 | 0.209 | 0.156 | 0.271 | 6.33E-01 | NA                                                                                                                                                                                                                                                                                                                                                                                                                                                                                                                                                |
| 2L | 9185493 | A | T | tai        | 1.10E-04 | 0.017 | 0.008 | 0.032 | 0.011 | 1.00E+00 | transcription coactivator activity;obsolete signal transducer activity;nucleus;regulation of transcription                                                                                                                                                                                                                                                                                                                                                                                                                                        |

|    |         |   |   |            |          |       |       |       |       |          |                                                                                                                                                                                                                                                                                                                                                                                                                                                                                                                                                                                                                                                                                                                                                                                                                                                                                                                                                                                         |
|----|---------|---|---|------------|----------|-------|-------|-------|-------|----------|-----------------------------------------------------------------------------------------------------------------------------------------------------------------------------------------------------------------------------------------------------------------------------------------------------------------------------------------------------------------------------------------------------------------------------------------------------------------------------------------------------------------------------------------------------------------------------------------------------------------------------------------------------------------------------------------------------------------------------------------------------------------------------------------------------------------------------------------------------------------------------------------------------------------------------------------------------------------------------------------|
| 2L | 9254319 | A | G | lectin-30A | 2.33E-05 | 0.333 | 0.250 | 0.357 | 0.195 | 4.60E-01 | galactose binding;extracellular space;carbohydrate binding;multicellular organism reproduction                                                                                                                                                                                                                                                                                                                                                                                                                                                                                                                                                                                                                                                                                                                                                                                                                                                                                          |
| 2L | 9365904 | C | T | (CG34181)  | 1.51E-04 | 0.056 | 0.095 | 0.043 | 0.132 | 5.87E-01 | NA                                                                                                                                                                                                                                                                                                                                                                                                                                                                                                                                                                                                                                                                                                                                                                                                                                                                                                                                                                                      |
| 2L | 1E+07   | A | G | CG42843    | 1.22E-04 | 0.143 | 0.169 | 0.100 | 0.227 | 4.17E-01 | cell fate determination;nucleic acid binding;Notch binding;protein binding;nucleus;cytoplasm;cell cortex;Notch signaling pathway;neuroblast fate determination;neuroblast proliferation;central nervous system development;ventral cord development;peripheral nervous system development;heart development;rhythmic behavior;protein localization;glial cell migration;asymmetric cell division;regulation of Notch signaling pathway;regulation of asymmetric cell division;sensory organ precursor cell fate determination;embryonic heart tube development;muscle cell fate specification;sensory organ precursor cell division;cell fate commitment;basal part of cell;basal cortex;negative regulation of Notch signaling pathway;positive regulation of endocytosis;regulation of neurogenesis;centrosome localization;regulation of nervous system development;asymmetric neuroblast division;pericardial nephrocyte differentiation;Malpighian tubule tip cell differentiation |
| 2L | 9447685 | C | T | numb       | 1.21E-04 | 0.119 | 0.150 | 0.083 | 0.167 | 9.94E-01 | sodium channel activity;sodium ion transport;integral component of membrane                                                                                                                                                                                                                                                                                                                                                                                                                                                                                                                                                                                                                                                                                                                                                                                                                                                                                                             |
| 2L | 9772922 | G | C | ppk16      | 7.39E-05 | 0.049 | 0.040 | 0.024 | 0.067 | 2.30E-01 | calmodulin binding;cytoplasm;response to oxidative stress;inositol-1                                                                                                                                                                                                                                                                                                                                                                                                                                                                                                                                                                                                                                                                                                                                                                                                                                                                                                                    |
| 2L | 9783859 | G | C | IP3K1      | 1.19E-04 | 0.173 | 0.139 | 0.118 | 0.185 | 3.62E-01 | cell-cell adhesion mediator activity; G protein-coupled receptor activity; axon guidance; dendrite self-avoidance; homophilic cell adhesion                                                                                                                                                                                                                                                                                                                                                                                                                                                                                                                                                                                                                                                                                                                                                                                                                                             |
| 2L | 9948936 | G | T | (CG5853)   | 6.81E-05 | 0.105 | 0.139 | 0.095 | 0.223 | 3.47E-02 | NA                                                                                                                                                                                                                                                                                                                                                                                                                                                                                                                                                                                                                                                                                                                                                                                                                                                                                                                                                                                      |
| 2L | 1E+07   | A | G | CG42843    | 1.22E-04 | 0.143 | 0.169 | 0.100 | 0.227 | 4.17E-01 | serine-type endopeptidase activity;proteolysis;carboxylic ester hydrolase activity;serine-type exopeptidase activity                                                                                                                                                                                                                                                                                                                                                                                                                                                                                                                                                                                                                                                                                                                                                                                                                                                                    |
| 2L | 1.2E+07 | A | T | (CG31706)  | 2.85E-05 | 0.099 | 0.122 | 0.144 | 0.077 | NA       | NA                                                                                                                                                                                                                                                                                                                                                                                                                                                                                                                                                                                                                                                                                                                                                                                                                                                                                                                                                                                      |
| 2L | 1.2E+07 | T | A | Pde1c      | 7.77E-05 | 0.242 | 0.206 | 0.237 | 0.176 | 8.84E-01 | calcium- and calmodulin-regulated 3',5'-cyclic-AMP/GMP phosphodiesterase activity; calmodulin binding; male mating behavior; signal transduction                                                                                                                                                                                                                                                                                                                                                                                                                                                                                                                                                                                                                                                                                                                                                                                                                                        |
| 2L | 1.2E+07 | G | A | bru-2      | 1.25E-04 | 0.040 | 0.054 | 0.072 | 0.010 | 1.10E-01 | nucleotide binding;RNA binding;mRNA binding;negative regulation of translation                                                                                                                                                                                                                                                                                                                                                                                                                                                                                                                                                                                                                                                                                                                                                                                                                                                                                                          |

|    |         |   |   |           |          |       |       |       |       |          |    |
|----|---------|---|---|-----------|----------|-------|-------|-------|-------|----------|----|
| 2L | 1.3E+07 | A | T | (bun)     | 5.72E-05 | 0.284 | 0.285 | 0.182 | 0.242 | 2.34E-01 | NA |
| 2L | 1.3E+07 | C | A | CG15484   | 1.29E-04 | 0.013 | 0.031 | 0.049 | 0.012 | 4.73E-01 |    |
| 2L | 1.3E+07 | A | T | (CG15483) | 1.95E-05 | 0.058 | 0.086 | 0.093 | 0.048 | 4.35E-01 | NA |
| 2L | 1.3E+07 | C | A | (kek1)    | 6.80E-05 | 0.118 | 0.141 | 0.195 | 0.090 | 3.85E-01 | NA |
| 2L | 1.3E+07 | A | C | CG42784   | 3.30E-05 | 0.207 | 0.189 | 0.179 | 0.294 | 1.93E-01 |    |
| 2L | 1.4E+07 | C | G | (nimB4)   | 1.54E-05 | 0.070 | 0.059 | 0.071 | 0.026 | 8.58E-01 | NA |

epithelial to mesenchymal transition;G protein-coupled receptor activity;plasma membrane;integral component of plasma membrane;G protein-coupled receptor signaling pathway;neuropeptide signaling pathway;regulation of chitin-based cuticle tanning;neuropeptide receptor activity;integral component of membrane;protein-hormone receptor activity

|    |         |   |   |               |          |       |       |       |       |          |  |
|----|---------|---|---|---------------|----------|-------|-------|-------|-------|----------|--|
| 2L | 1.4E+07 | G | A | rK            | 4.75E-05 | 0.634 | 0.705 | 0.599 | 0.757 | 9.03E-01 |  |
| 2L | 1.4E+07 | G | T | nAcRalpha-34E | 7.24E-05 | 0.040 | 0.037 | 0.012 | 0.054 | 4.39E-01 |  |

acetylcholine-gated cation-selective channel activity;transmembrane signaling receptor;cation transport;chemical synaptic transmission;ion transmembrane transport;nervous system process;regulation of membrane potential

|    |         |   |   |            |          |       |       |       |       |          |                                                           |
|----|---------|---|---|------------|----------|-------|-------|-------|-------|----------|-----------------------------------------------------------|
| 2L | 1.5E+07 | C | T | GABA-B-R1  | 1.39E-04 | 0.158 | 0.231 | 0.158 | 0.253 | 5.37E-01 | heterodimeric complex;protein heterodimerization activity |
| 2L | 1.6E+07 | A | T | (l_2_35Dj) | 9.44E-05 | 0.153 | 0.178 | 0.214 | 0.128 | 2.75E-01 | NA                                                        |
| 2L | 1.6E+07 | G | A | (CG7653)   | 2.51E-05 | 0.147 | 0.159 | 0.178 | 0.107 | 1.66E-01 | NA                                                        |
| 2L | 1.6E+07 | G | A | (beat-1a)  | 1.51E-04 | 0.028 | 0.053 | 0.022 | 0.050 | 7.62E-01 | NA                                                        |
| 2L | 1.6E+07 | G | C | (CG34168)  | 1.33E-04 | 0.141 | 0.145 | 0.187 | 0.093 | 6.22E-01 | NA                                                        |

G protein-coupled GABA receptor activity;integral component of plasma membrane;G protein-coupled receptor signaling pathway;negative regulation of adenylate cyclase activity;gamma-aminobutyric acid signaling pathway;integral component of membrane;G protein-coupled receptor

|    |         |   |   |            |          |       |       |       |       |          |                                                                                                                                                                                                                                                            |
|----|---------|---|---|------------|----------|-------|-------|-------|-------|----------|------------------------------------------------------------------------------------------------------------------------------------------------------------------------------------------------------------------------------------------------------------|
| 2L | 1.6E+07 | C | T | Ca-alpha1D | 5.70E-06 | 0.170 | 0.159 | 0.251 | 0.122 | 2.63E-01 | voltage-gated calcium channel activity;voltage-gated calcium channel complex;calcium ion transport;muscle contraction;embryo development;basolateral plasma membrane;apical plasma membrane;epithelial fluid transport;calcium ion transmembrane transport |
| 2L | 1.6E+07 | G | A | CG42818    | 6.96E-05 | 0.066 | 0.093 | 0.118 | 0.078 | 3.78E-02 |                                                                                                                                                                                                                                                            |
| 2L | 1.7E+07 | G | C | CG42389    | 7.61E-05 | 0.262 | 0.212 | 0.164 | 0.240 | 7.62E-01 |                                                                                                                                                                                                                                                            |



|    |         |   |   |           |          |       |       |       |       |          |          |          |                                                                                                                                                                                                                                                                                                                                                                                                                                                                                                                                |
|----|---------|---|---|-----------|----------|-------|-------|-------|-------|----------|----------|----------|--------------------------------------------------------------------------------------------------------------------------------------------------------------------------------------------------------------------------------------------------------------------------------------------------------------------------------------------------------------------------------------------------------------------------------------------------------------------------------------------------------------------------------|
| 2L | 1.7E+07 | G | A | trpgamma  | 4.10E-06 | 0.640 | 0.673 | 0.599 | 0.668 | 1.67E-03 | NA       | NA       | cation channel activity;mechanosensitive ion channel activity;calcium channel activity;inositol 1,4,5 triphosphate binding;adult walking behavior;neuromuscular process controlling posture                                                                                                                                                                                                                                                                                                                                    |
| 2L | 1.8E+07 | T | C | (CR43304) | 1.45E-04 | 0.062 | 0.110 | 0.091 | 0.147 | NA       | NA       | NA       | NA;calcium ion binding;plasma membrane;integral component of plasma membrane;homophilic cell adhesion via plasma membrane adhesion molecules;ommatidial rotation;calcium-dependent cell-cell adhesion via plasma membrane cell adhesion molecules;R8 cell development;R7 cell development;axon extension involved in axon guidance;cell adhesion molecule binding                                                                                                                                                              |
| 2L | 1.8E+07 | A | C | CadN2     | 1.27E-07 | 0.279 | 0.321 | 0.370 | 0.199 | 6.71E-01 | 6.71E-01 | 6.71E-01 | adhesion molecule binding                                                                                                                                                                                                                                                                                                                                                                                                                                                                                                      |
| 2L | 1.8E+07 | C | T | (CadN2)   | 9.05E-05 | 0.114 | 0.070 | 0.042 | 0.107 | 4.11E-02 | NA       | NA       | adhesion molecule binding                                                                                                                                                                                                                                                                                                                                                                                                                                                                                                      |
| 2L | 1.8E+07 | T | C | rdo       | 1.09E-04 | 0.313 | 0.355 | 0.480 | 0.387 | 3.07E-01 | 3.07E-01 | 3.07E-01 | ocellus development                                                                                                                                                                                                                                                                                                                                                                                                                                                                                                            |
| 2L | 1.8E+07 | A | G | CG42750   | 4.44E-05 | 0.013 | 0.032 | 0.027 | 0.078 | 3.08E-01 | 3.08E-01 | 3.08E-01 | proteolysis;metalloexopeptidase activity;dipeptidyl-peptidase activity;dipeptidase activity                                                                                                                                                                                                                                                                                                                                                                                                                                    |
| 2L | 1.8E+07 | C | T | (CG31787) | 7.40E-06 | 0.481 | 0.394 | 0.326 | 0.526 | 8.20E-04 | NA       | NA       | activity;dipeptidase activity                                                                                                                                                                                                                                                                                                                                                                                                                                                                                                  |
| 2L | 1.8E+07 | C | T | (CG31787) | 6.37E-06 | 0.490 | 0.398 | 0.321 | 0.536 | 7.18E-04 | NA       | NA       | activity;dipeptidase activity                                                                                                                                                                                                                                                                                                                                                                                                                                                                                                  |
| 2L | 1.8E+07 | A | G | (CG31787) | 1.33E-04 | 0.023 | 0.023 | 0.036 | 0.010 | 7.82E-01 | NA       | NA       | activity;dipeptidase activity                                                                                                                                                                                                                                                                                                                                                                                                                                                                                                  |
| 2L | 1.9E+07 | A | G | Pde11     | 8.90E-05 | 0.483 | 0.464 | 0.410 | 0.508 | 2.33E-01 | 2.33E-01 | 2.33E-01 | 3',5'-cyclic-AMP/GMP phosphodiesterase activity                                                                                                                                                                                                                                                                                                                                                                                                                                                                                |
| 2L | 1.9E+07 | T | C | (tup)     | 1.08E-04 | 0.855 | 0.860 | 0.898 | 0.820 | 3.48E-01 | NA       | NA       | activity;dipeptidase activity                                                                                                                                                                                                                                                                                                                                                                                                                                                                                                  |
| 2L | 1.9E+07 | T | A | CG10650   | 5.75E-05 | 0.039 | 0.038 | 0.029 | 0.066 | 1.00E+00 | 1.00E+00 | 1.00E+00 | activity;dipeptidase activity                                                                                                                                                                                                                                                                                                                                                                                                                                                                                                  |
| 2L | 1.9E+07 | G | A | Ddc       | 6.03E-05 | 0.512 | 0.534 | 0.512 | 0.587 | 7.52E-02 | 7.52E-02 | 7.52E-02 | aromatic-L-amino-acid decarboxylase activity;catecholamine metabolic process;dopamine biosynthetic process from tyrosine;serotonin biosynthetic process from tryptophan;learning or memory;anesthesia-resistant memory;long-term memory;courtship behavior;eclosion rhythm;response to wounding;pyridoxal phosphate binding;wing disc development;growth;thermosensory behavior;thermotaxis;developmental pigmentation;regulation of adult chitin-containing cuticle pigmentation;adult chitin-containing cuticle pigmentation |

|    |         |   |   |           |          |       |       |       |       |          |                                                                                                                                                                                                                                                                                                                                                                                                                             |
|----|---------|---|---|-----------|----------|-------|-------|-------|-------|----------|-----------------------------------------------------------------------------------------------------------------------------------------------------------------------------------------------------------------------------------------------------------------------------------------------------------------------------------------------------------------------------------------------------------------------------|
| 2L | 1.9E+07 | T | C | drl       | 4.68E-06 | 0.066 | 0.067 | 0.094 | 0.028 | 3.62E-02 | protein tyrosine kinase activity;transmembrane receptor<br>protein tyrosine kinase activity;ATP binding;plasma<br>membrane;protein phosphorylation;signal transduction;axon<br>guidance;salivary gland morphogenesis;haltere<br>development;learning or memory;memory;olfactory<br>learning;axon midline choice point recognition;muscle<br>attachment;determination of muscle attachment site;Wnt-<br>protein binding;axon |
| 2L | 1.9E+07 | C | T | bsh       | 1.04E-04 | 0.078 | 0.095 | 0.133 | 0.084 | 8.22E-04 | protein tyrosine kinase activity;transmembrane receptor<br>protein tyrosine kinase activity;ATP binding;plasma<br>membrane;protein phosphorylation;signal transduction;axon<br>guidance;salivary gland morphogenesis;haltere<br>development;learning or memory;memory;olfactory<br>learning;axon midline choice point recognition;muscle<br>attachment;determination of muscle attachment site;Wnt-<br>protein binding;axon |
| 2L | 2.1E+07 | A | T | (Osegs5)  | 1.39E-04 | 0.248 | 0.255 | 0.360 | 0.246 | 8.32E-01 | transcription regulatory region sequence-specific DNA<br>binding;DNA-binding transcription factor                                                                                                                                                                                                                                                                                                                           |
| 2L | 2.2E+07 | C | A | (tsh)     | 4.04E-05 | 0.050 | 0.037 | 0.046 | 0.122 | NA       | activity;nucleus;regulation of transcription<br>NA                                                                                                                                                                                                                                                                                                                                                                          |
| 2R | 1412432 | A | G | CG30438   | 1.08E-04 | 0.017 | 0.063 | 0.053 | 0.033 | 5.97E-03 | metabolic process;transferase activity<br>negative regulation of transcription by RNA polymerase<br>II;nucleic acid binding;DNA-binding transcription factor<br>activity;nucleus;regulation of transcription<br>intracellular protein transport;imaginal disc-derived wing<br>morphogenesis;Rab GTPase binding                                                                                                              |
| 2R | 2476210 | T | C | jing      | 3.32E-05 | 0.095 | 0.085 | 0.068 | 0.147 | 3.73E-01 | negative regulation of transcription by RNA polymerase<br>II;nucleic acid binding;DNA-binding transcription factor<br>activity;nucleus;regulation of transcription<br>intracellular protein transport;imaginal disc-derived wing<br>morphogenesis;Rab GTPase binding                                                                                                                                                        |
| 2R | 3527213 | T | C | CG43340   | 2.11E-05 | 0.743 | 0.808 | 0.845 | 0.792 | 9.22E-01 | intracellular protein transport;imaginal disc-derived wing<br>morphogenesis;Rab GTPase binding                                                                                                                                                                                                                                                                                                                              |
| 2R | 4166659 | T | C | (CG30371) | 5.47E-05 | 0.094 | 0.063 | 0.095 | 0.049 | 1.10E-02 | NA                                                                                                                                                                                                                                                                                                                                                                                                                          |
| 2R | 4180261 | A | C | (CG30371) | 7.55E-05 | 0.895 | 0.906 | 0.929 | 0.852 | 4.12E-01 | NA                                                                                                                                                                                                                                                                                                                                                                                                                          |
| 2R | 4237786 | A | G | pdm3      | 1.49E-04 | 0.027 | 0.028 | 0.019 | 0.062 | 5.67E-01 | DNA-binding transcription factor activity;nucleus;regulation of<br>transcription                                                                                                                                                                                                                                                                                                                                            |
| 2R | 4684621 | A | G | (sns)     | 3.90E-05 | 0.024 | 0.033 | 0.011 | 0.047 | 8.97E-02 | NA                                                                                                                                                                                                                                                                                                                                                                                                                          |
| 2R | 5046734 | G | C | CG8008    | 1.23E-04 | 0.554 | 0.473 | 0.440 | 0.570 | 2.02E-01 | integral component of membrane;transmembrane transport<br>extracellular region;vitelline membrane formation involved in<br>chorion-containing eggshell formation;terminal region<br>determination;torso signaling pathway                                                                                                                                                                                                   |
| 2R | 5486967 | C | T | clos      | 4.55E-05 | 0.334 | 0.377 | 0.320 | 0.406 | 4.07E-03 | extracellular region;vitelline membrane formation involved in<br>chorion-containing eggshell formation;terminal region<br>determination;torso signaling pathway                                                                                                                                                                                                                                                             |

|    |         |   |   |           |          |       |       |       |       |          |                                                                                                                                                                                                                                                                                                                             |
|----|---------|---|---|-----------|----------|-------|-------|-------|-------|----------|-----------------------------------------------------------------------------------------------------------------------------------------------------------------------------------------------------------------------------------------------------------------------------------------------------------------------------|
| 2R | 5941384 | T | C | magu      | 1.13E-04 | 0.417 | 0.456 | 0.403 | 0.587 | 5.12E-04 | calcium ion binding;extracellular region;NA;determination of adult lifespan;external side of plasma membrane;regulation of BMP signaling pathway;positive regulation of BMP signaling pathway;germ-line stem cell population maintenance;heparan sulfate proteoglycan binding;regulation of imaginal disc-derived wing size |
| 2R | 6289071 | A | C | CG42732   | 1.10E-04 | 0.143 | 0.154 | 0.143 | 0.241 | 2.11E-01 | potassium channel activity;potassium ion transport;calcium-activated potassium channel activity;membrane;neurogenesis;neuron projection morphogenesis                                                                                                                                                                       |
| 2R | 6321928 | C | T | RanBPM    | 1.13E-05 | 0.091 | 0.116 | 0.092 | 0.129 | 6.93E-02 | cytoplasm;cytoskeleton organization;receptor signaling pathway via JAK-STAT;ovarian follicle cell-cell adhesion;Ran GTPase binding;larval feeding behavior;dorsal appendage formation;germ-line stem-cell niche homeostasis                                                                                                 |
| 2R | 6322353 | T | C | RanBPM    | 8.88E-05 | 0.131 | 0.138 | 0.144 | 0.113 | 8.76E-01 | cytoplasm;cytoskeleton organization;receptor signaling pathway via JAK-STAT;ovarian follicle cell-cell adhesion;Ran GTPase binding;larval feeding behavior;dorsal appendage formation;germ-line stem-cell niche homeostasis                                                                                                 |
| 2R | 6384019 | T | G | lola      | 1.40E-04 | 0.807 | 0.737 | 0.770 | 0.650 | 6.70E-01 | startle response;inter-male aggressive behavior;nucleic acid binding;DNA-binding transcription factor activity;protein binding;nucleus;regulation of transcription                                                                                                                                                          |
| 2R | 6679768 | A | G | mthl13    | 1.21E-04 | 0.896 | 0.914 | 0.879 | 0.955 | 7.71E-02 | G protein-coupled receptor activity;G protein-coupled receptor signaling pathway;integral component of membrane                                                                                                                                                                                                             |
| 2R | 6746358 | T | G | CG30015   | 1.41E-04 | 0.728 | 0.701 | 0.669 | 0.808 | 2.95E-01 | ubiquitin-protein transferase activity;zinc ion binding;protein ubiquitination                                                                                                                                                                                                                                              |
| 2R | 7545689 | A | G | Roc2      | 1.15E-05 | 0.195 | 0.200 | 0.241 | 0.155 | 7.51E-01 | fibroblast growth factor receptor binding;hindgut morphogenesis;mesoderm development;heart development;larval visceral muscle development;larval somatic muscle development;growth factor activity;fibroblast growth factor receptor signaling pathway;glial cell                                                           |
| 2R | 7630421 | T | C | (pyr)     | 1.43E-04 | 0.045 | 0.043 | 0.023 | 0.048 | 3.86E-01 | NA                                                                                                                                                                                                                                                                                                                          |
| 2R | 7669315 | G | A | ths       | 6.59E-05 | 0.091 | 0.115 | 0.153 | 0.095 | 4.22E-02 | differentiation;myoblast migration                                                                                                                                                                                                                                                                                          |
| 2R | 8090152 | G | C | (CG8858)  | 1.07E-04 | 0.087 | 0.107 | 0.073 | 0.133 | 5.36E-01 | NA                                                                                                                                                                                                                                                                                                                          |
| 2R | 8300037 | T | C | (Cpr49Ah) | 2.92E-05 | 0.606 | 0.638 | 0.702 | 0.617 | 6.15E-02 | NA                                                                                                                                                                                                                                                                                                                          |

|    |         |   |   |        |          |       |       |       |       |          |                                                                                                                                                                                                                                                                                                                                                                                                                                                                                                                                                                                                                                                                                                                                                                 |
|----|---------|---|---|--------|----------|-------|-------|-------|-------|----------|-----------------------------------------------------------------------------------------------------------------------------------------------------------------------------------------------------------------------------------------------------------------------------------------------------------------------------------------------------------------------------------------------------------------------------------------------------------------------------------------------------------------------------------------------------------------------------------------------------------------------------------------------------------------------------------------------------------------------------------------------------------------|
| 2R | 8669385 | T | C | sca    | 1.12E-04 | 0.023 | 0.036 | 0.024 | 0.065 | 1.81E-01 | obsolete signal transducer activity;extracellular region;fibrinogen complex;nervous system development;R8 cell fate commitment;chaeta morphogenesis;imaginal disc-derived wing margin morphogenesis;ommatidial rotation;female meiosis chromosome segregation;regulation of R8 cell spacing in compound eye;lateral inhibition;compound eye development;response to alcohol                                                                                                                                                                                                                                                                                                                                                                                     |
| 2R | 9412636 | G | A | Vmat   | 2.69E-06 | 0.073 | 0.104 | 0.201 | 0.105 | 7.43E-01 | obsolete synaptic vesicle amine transmembrane transporter activity;neurotransmitter transport;synaptic vesicle;monoamine transmembrane transporter activity;drug transmembrane transporter activity;aminergic neurotransmitter loading into synaptic vesicle;monoamine transport;dopamine transport;integral component of membrane;neuromuscular junction;histamine transport;transmembrane transport                                                                                                                                                                                                                                                                                                                                                           |
| 2R | 9609003 | T | A | fas    | 1.49E-04 | 0.072 | 0.091 | 0.056 | 0.134 | NA       | morphogenesis of an epithelium;dorsal closure;salivary gland development;salivary gland morphogenesis;foregut morphogenesis;Malpighian tubule morphogenesis;cardioblast cell fate determination;head involution;maintenance of polarity of embryonic epithelium                                                                                                                                                                                                                                                                                                                                                                                                                                                                                                 |
| 2R | 9821791 | G | A | shot   | 1.22E-04 | 0.443 | 0.449 | 0.497 | 0.368 | 9.30E-01 | microtubule cytoskeleton organization;astral microtubule;microtubule bundle formation;actin binding;calcium ion binding;protein binding;cytoskeleton;microtubule;adherens junction;microtubule-based process;negative regulation of microtubule depolymerization;cell cycle arrest;axonogenesis;sensory organ development;open tracheal system development;apposition of dorsal and ventral imaginal disc-derived wing surfaces;muscle organ development;microtubule binding;cytoskeletal protein binding;axon midline choice point recognition;muscle attachment;determination of muscle attachment site;mushroom body development;actin cytoskeleton organization;filopodium;growth cone;regulation of axon extension;oocyte fate determination;branch fusion |
| 2R | 9959741 | A | G | Prosap | 7.17E-05 | 0.616 | 0.621 | 0.598 | 0.694 | 2.63E-01 | protein binding;postsynaptic density;GKAP/Homer scaffold activity;postsynaptic density assembly                                                                                                                                                                                                                                                                                                                                                                                                                                                                                                                                                                                                                                                                 |

|    |         |   |   |            |          |       |       |       |       |          |                                                             |
|----|---------|---|---|------------|----------|-------|-------|-------|-------|----------|-------------------------------------------------------------|
| 2R | 1.1E+07 | T | C | CG30480    | 1.24E-04 | 0.270 | 0.316 | 0.248 | 0.391 | 9.02E-01 |                                                             |
| 2R | 1.1E+07 | T | A | mspo       | 8.89E-05 | 0.216 | 0.191 | 0.223 | 0.093 | 1.09E-01 | regulation of myoblast fusion                               |
| 2R | 1.1E+07 | A | C | igl        | 1.81E-05 | 0.517 | 0.485 | 0.504 | 0.440 | 5.71E-01 | calmodulin binding;cell cortex;myosin light chain binding   |
| 2R | 1.1E+07 | A | T | trpm       | 9.55E-05 | 0.489 | 0.436 | 0.367 | 0.473 | 5.34E-01 | zinc ion transmembrane transporter activity                 |
| 2R | 1.1E+07 | C | T | (CG8157)   | 3.82E-05 | 0.192 | 0.202 | 0.160 | 0.225 | 1.48E-01 | NA                                                          |
|    |         |   |   |            |          |       |       |       |       |          | protein tyrosine kinase activity;non-membrane spanning      |
|    |         |   |   |            |          |       |       |       |       |          | protein tyrosine kinase activity;ATP binding;cytoplasm;cell |
|    |         |   |   |            |          |       |       |       |       |          | cortex;protein phosphorylation;JNK cascade;eggshell chorion |
| 2R | 1.2E+07 | C | T | shark      | 8.40E-05 | 0.431 | 0.306 | 0.353 | 0.266 | 6.88E-01 | assembly;dorsal closure;dorsal closure                      |
| 2R | 1.2E+07 | T | C | (CG15711)  | 6.43E-05 | 0.027 | 0.045 | 0.055 | 0.029 | 5.45E-01 | NA                                                          |
|    |         |   |   |            |          |       |       |       |       |          | dolichol kinase activity;integral component of endoplasmic  |
|    |         |   |   |            |          |       |       |       |       |          | reticulum membrane;dolichyl monophosphate biosynthetic      |
| 2R | 1.2E+07 | A | T | CG8311     | 4.49E-05 | 0.043 | 0.070 | 0.031 | 0.077 | 4.92E-01 | process                                                     |
| 2R | 1.3E+07 | A | T | CG8910     | 8.57E-05 | 0.097 | 0.099 | 0.066 | 0.131 | 1.52E-03 | zinc ion binding                                            |
|    |         |   |   |            |          |       |       |       |       |          | nucleic acid binding;asparagine-tRNA ligase activity;ATP    |
| 2R | 1.3E+07 | G | A | CG6796     | 2.58E-05 | 0.060 | 0.070 | 0.030 | 0.074 | 5.01E-01 | binding;cytoplasm;asparaginyl-tRNA aminoacylation           |
| 2R | 1.3E+07 | G | C | CG30460    | 5.00E-05 | 0.867 | 0.838 | 0.871 | 0.798 | NA       | NA                                                          |
| 2R | 1.3E+07 | T | C | CG30460    | 1.36E-04 | 0.868 | 0.836 | 0.871 | 0.791 | NA       | NA                                                          |
| 2R | 1.3E+07 | A | G | (CG15611)  | 4.66E-05 | 0.031 | 0.063 | 0.080 | 0.026 | 5.00E-01 | NA                                                          |
| 2R | 1.3E+07 | C | T | mbl        | 6.98E-05 | 0.400 | 0.353 | 0.233 | 0.372 | 2.17E-01 | regulation of alternative mRNA splicing                     |
| 2R | 1.4E+07 | C | A | elk        | 6.46E-05 | 0.111 | 0.157 | 0.158 | 0.129 | 2.30E-01 |                                                             |
| 2R | 1.4E+07 | T | C | dpr13      | 6.36E-05 | 0.043 | 0.030 | 0.030 | 0.068 | NA       | sensory perception of chemical stimulus                     |
| 2R | 1.4E+07 | G | A | (stau)     | 5.70E-05 | 0.055 | 0.050 | 0.074 | 0.031 | 8.07E-01 | NA                                                          |
| 2R | 1.4E+07 | G | A | CG18537    | 1.79E-05 | 0.180 | 0.156 | 0.128 | 0.186 | 8.63E-01 |                                                             |
|    |         |   |   |            |          |       |       |       |       |          | phosphoenolpyruvate carboxykinase (GTP) activity;GTP        |
|    |         |   |   |            |          |       |       |       |       |          | binding;mitochondrion;gluconeogenesis                       |
| 2R | 1.4E+07 | A | C | Pepck      | 1.07E-04 | 0.385 | 0.436 | 0.341 | 0.498 | 3.57E-01 |                                                             |
| 2R | 1.5E+07 | C | A | Hs3st-A    | 7.68E-06 | 0.305 | 0.322 | 0.227 | 0.365 | 9.54E-01 | [heparan sulfate]-glucosamine 3-sulfotransferase 1 activity |
| 2R | 1.5E+07 | A | C | (CG15115)  | 7.57E-05 | 0.068 | 0.050 | 0.081 | 0.029 | 6.80E-01 | NA                                                          |
| 2R | 1.5E+07 | A | T | CG10081    | 6.12E-05 | 0.082 | 0.066 | 0.046 | 0.078 | 9.57E-02 | proteolysis;peptidase activity                              |
| 2R | 1.5E+07 | G | C | (sm)       | 1.13E-04 | 0.116 | 0.089 | 0.088 | 0.052 | NA       | NA                                                          |
| 2R | 1.7E+07 | G | C | (shg)      | 1.37E-04 | 0.160 | 0.190 | 0.180 | 0.274 | 4.96E-02 | NA                                                          |
|    |         |   |   |            |          |       |       |       |       |          | phosphatidylinositol binding;deactivation of rhodopsin      |
|    |         |   |   |            |          |       |       |       |       |          | mediated signaling;protein localization to cilium;glucose   |
| 2R | 1.7E+07 | A | T | king-tubby | 1.35E-04 | 0.134 | 0.153 | 0.151 | 0.112 | 4.87E-01 | homeostasis                                                 |
| 2R | 1.7E+07 | C | A | Magi       | 5.31E-05 | 0.281 | 0.405 | 0.390 | 0.311 | 2.54E-01 | guanylate kinase activity;membrane;Ral GTPase binding       |

|    |         |   |   |           |          |       |       |       |       |          |                                                                                                             |                                                                                                                                                                                           |
|----|---------|---|---|-----------|----------|-------|-------|-------|-------|----------|-------------------------------------------------------------------------------------------------------------|-------------------------------------------------------------------------------------------------------------------------------------------------------------------------------------------|
| 2R | 1.7E+07 | C | T | (Rgk3)    | 1.45E-04 | 0.264 | 0.243 | 0.172 | 0.301 | NA       | NA                                                                                                          | NA                                                                                                                                                                                        |
| 2R | 1.7E+07 | A | C | (Rgk3)    | 1.26E-04 | 0.251 | 0.239 | 0.158 | 0.292 | NA       | NA                                                                                                          | GTP binding;obsolete GTP catabolic process;small GTPase                                                                                                                                   |
| 2R | 1.7E+07 | C | T | Rgk3      | 1.02E-04 | 0.306 | 0.359 | 0.273 | 0.381 | 2.28E-02 | mediated signal transduction;membrane transporter activity;ATP binding;response to zinc ion;ATPase activity |                                                                                                                                                                                           |
| 2R | 1.7E+07 | G | C | CG10505   | 1.30E-04 | 0.147 | 0.084 | 0.062 | 0.126 | 2.11E-01 | activity                                                                                                    | transmembrane signaling receptor activity;extracellular region;plasma membrane;focal adhesion;axon guidance;epithelial cell migration                                                     |
| 2R | 1.7E+07 | T | G | Sdc       | 1.34E-04 | 0.036 | 0.027 | 0.046 | 0.020 | 5.94E-01 | adherens junction;apical plasma membrane;compound eye development                                           |                                                                                                                                                                                           |
| 2R | 1.8E+07 | T | A | a         | 8.94E-06 | 0.656 | 0.573 | 0.571 | 0.658 | NA       | development                                                                                                 | negative regulation of transcription by RNA polymerase II;AT DNA binding;DNA-binding transcription factor activity;nucleus;regulation of transcription                                    |
| 2R | 1.8E+07 | C | T | dve       | 1.24E-04 | 0.288 | 0.249 | 0.305 | 0.178 | NA       | neurogenesis                                                                                                | mitotic spindle elongation;structural constituent of ribosome;ribosome;translation;mitotic spindle organization;myosin binding;neurogenesis;cytosolic large ribosomal subunit             |
| 2R | 1.8E+07 | G | A | CG4554    | 1.10E-05 | 0.042 | 0.034 | 0.012 | 0.048 | 5.64E-01 | neurogenesis                                                                                                | metalloendopeptidase activity;proteolysis;cell population proliferation                                                                                                                   |
| 2R | 1.9E+07 | T | A | Rpl23     | 3.26E-05 | 0.276 | 0.295 | 0.275 | 0.345 | 8.81E-01 | ribosomal subunit                                                                                           | metalloendopeptidase activity;proteolysis;cell population proliferation                                                                                                                   |
| 2R | 2E+07   | C | T | CG9850    | 1.33E-04 | 0.084 | 0.052 | 0.095 | 0.029 | 1.71E-01 | proliferation                                                                                               | mRNA splicing                                                                                                                                                                             |
| 2R | 2E+07   | A | C | Ytr       | 8.56E-05 | 0.185 | 0.215 | 0.224 | 0.134 | 2.02E-01 | mRNA splicing                                                                                               | scavenger receptor activity;lysosome;plasma membrane;integral component of plasma membrane;defense response;cell adhesion;salivary gland cell autophagic cell death;autophagic cell death |
| 2R | 2.1E+07 | T | C | emp       | 2.18E-05 | 0.605 | 0.545 | 0.456 | 0.682 | 6.56E-01 | death;autophagic cell death                                                                                 | G protein-coupled receptor activity;response to stress;G protein-coupled receptor signaling pathway;determination of protein-coupled receptor component of membrane                       |
| 3L | 331062  | A | G | mith9     | 8.76E-05 | 0.197 | 0.200 | 0.160 | 0.243 | 6.94E-01 | adult lifespan;integral component of membrane                                                               | adult lifespan;integral component of membrane                                                                                                                                             |
| 3L | 1269786 | C | G | CG9134    | 3.38E-05 | 0.068 | 0.055 | 0.073 | 0.026 | 4.91E-01 | carbohydrate binding                                                                                        | carbohydrate binding                                                                                                                                                                      |
| 3L | 1658473 | T | C | CG7971    | 5.94E-05 | 0.590 | 0.590 | 0.491 | 0.620 | 3.55E-01 | mRNA splicing                                                                                               | mRNA splicing                                                                                                                                                                             |
| 3L | 2198846 | T | G | (CG8960)  | 9.58E-05 | 0.873 | 0.866 | 0.854 | 0.900 | 5.45E-02 | NA                                                                                                          | NA                                                                                                                                                                                        |
| 3L | 2210365 | C | G | (CG15878) | 7.08E-05 | 0.634 | 0.607 | 0.738 | 0.538 | 2.26E-01 | NA                                                                                                          | myosuppressin receptor activity;G protein-coupled receptor activity;neuropeptide receptor activity;adult locomotory behavior                                                              |
| 3L | 2327513 | T | C | DmsR-1    | 7.35E-05 | 0.217 | 0.223 | 0.226 | 0.282 | NA       | NA                                                                                                          | myosuppressin receptor activity;G protein-coupled receptor activity;neuropeptide receptor activity;adult locomotory behavior                                                              |

|    |         |   |   |           |          |       |       |       |       |          |    |                                                                                                                                                                                                                                                                                                                                                           |
|----|---------|---|---|-----------|----------|-------|-------|-------|-------|----------|----|-----------------------------------------------------------------------------------------------------------------------------------------------------------------------------------------------------------------------------------------------------------------------------------------------------------------------------------------------------------|
| 3L | 2964616 | C | A | (CG34025) | 1.67E-05 | 0.115 | 0.131 | 0.083 | 0.146 | NA       | NA |                                                                                                                                                                                                                                                                                                                                                           |
| 3L | 3476925 | C | A | (CG32267) | 2.14E-05 | 0.035 | 0.040 | 0.025 | 0.058 | 9.71E-01 | NA |                                                                                                                                                                                                                                                                                                                                                           |
| 3L | 3844675 | A | G | (Awh)     | 7.39E-05 | 0.832 | 0.777 | 0.830 | 0.760 | 6.00E-01 | NA | SNARE binding;autophagosome membrane;SNAP receptor activity;plasma membrane;endoplasmic reticulum to Golgi vesicle-mediated transport;neurotransmitter secretion;synaptic vesicle docking;vesicle-mediated transport;SNARE complex;neuron cellular homeostasis;endoplasmic reticulum-Golgi intermediate compartment organization;autophagosome maturation |
| 3L | 4404707 | A | G | Syx17     | 5.37E-05 | 0.589 | 0.581 | 0.667 | 0.500 | 1.52E-02 | NA | serine-type endopeptidase activity;extracellular region;proteolysis;eggshell chorion assembly;oocyte dorsal/ventral axis specification;maternal specification of                                                                                                                                                                                          |
| 3L | 4842109 | C | A | (CG13707) | 2.50E-05 | 0.923 | 0.926 | 0.924 | 0.953 | 7.18E-01 | NA | dorsal/ventral axis                                                                                                                                                                                                                                                                                                                                       |
| 3L | 5389566 | G | C | (Ir64a)   | 9.40E-05 | 0.600 | 0.592 | 0.483 | 0.606 | NA       | NA | integral component of membrane;transmembrane transport                                                                                                                                                                                                                                                                                                    |
| 3L | 6590431 | A | G | ndl       | 1.23E-04 | 0.117 | 0.099 | 0.153 | 0.105 | NA       | NA | dorsal/ventral axis                                                                                                                                                                                                                                                                                                                                       |
| 3L | 7335246 | G | A | CG8596    | 3.16E-05 | 0.109 | 0.077 | 0.099 | 0.141 | 8.79E-05 | NA | integral component of membrane;transmembrane transport                                                                                                                                                                                                                                                                                                    |
| 3L | 7454495 | T | C | (CG42660) | 1.33E-04 | 0.081 | 0.039 | 0.048 | 0.020 | 3.66E-01 | NA |                                                                                                                                                                                                                                                                                                                                                           |
| 3L | 7639899 | A | T | (CG32373) | 4.57E-05 | 0.331 | 0.283 | 0.212 | 0.358 | 1.14E-01 | NA |                                                                                                                                                                                                                                                                                                                                                           |
| 3L | 7951378 | T | C | (exex)    | 1.02E-04 | 0.051 | 0.034 | 0.051 | 0.022 | 6.02E-01 | NA |                                                                                                                                                                                                                                                                                                                                                           |
| 3L | 8284093 | G | A | CG7201    | 8.33E-05 | 0.074 | 0.071 | 0.088 | 0.033 | 4.19E-01 | NA |                                                                                                                                                                                                                                                                                                                                                           |
| 3L | 8318762 | G | C | (CG34461) | 4.52E-05 | 0.462 | 0.342 | 0.432 | 0.317 | 8.96E-01 | NA | cytoplasm;lipid metabolic process;integral component of membrane;oxidoreductase activity                                                                                                                                                                                                                                                                  |
| 3L | 8606593 | T | G | CG6282    | 7.18E-05 | 0.224 | 0.237 | 0.115 | 0.200 | 9.25E-01 | NA | membrane;oxidoreductase activity                                                                                                                                                                                                                                                                                                                          |
| 3L | 8688265 | G | A | (h)       | 1.04E-04 | 0.046 | 0.051 | 0.052 | 0.022 | 3.73E-01 | NA |                                                                                                                                                                                                                                                                                                                                                           |

|    |         |   |   |         |          |       |       |       |       |          |                                                                                                                                                                                                                                                                                                                                                                                                                                                                                                                                                                                                                                                                                                                                                                                                                                                                                                                                                                                                                                                                                                           |
|----|---------|---|---|---------|----------|-------|-------|-------|-------|----------|-----------------------------------------------------------------------------------------------------------------------------------------------------------------------------------------------------------------------------------------------------------------------------------------------------------------------------------------------------------------------------------------------------------------------------------------------------------------------------------------------------------------------------------------------------------------------------------------------------------------------------------------------------------------------------------------------------------------------------------------------------------------------------------------------------------------------------------------------------------------------------------------------------------------------------------------------------------------------------------------------------------------------------------------------------------------------------------------------------------|
| 3L | 8843663 | C | T | dally   | 1.05E-04 | 0.210 | 0.224 | 0.304 | 0.187 | NA       | protein binding; extracellular region; NA; transforming growth factor beta receptor signaling pathway; nervous system development; axonogenesis; wing disc morphogenesis; imaginal disc-derived wing morphogenesis; imaginal disc-derived leg morphogenesis; motor neuron axon guidance; sensory organ boundary specification; decapentaplegic signaling pathway; G2/M1 transition of meiotic cell cycle; chaeta morphogenesis; imaginal disc-derived wing vein morphogenesis; cell surface; membrane; Wnt signaling pathway; extrinsic component of plasma membrane; chaeta development; regulation of BMP signaling pathway; positive regulation of BMP signaling pathway; germ-line stem cell population maintenance; wing disc development; regulation of multicellular organism growth; heparan sulfate proteoglycan binding; regulation of imaginal disc growth; female germ-line stem cell asymmetric division; wing disc dorsal/ventral pattern formation; compound eye development; dendrite morphogenesis; regulation of cell cycle; negative regulation of semaphorin-plexin signaling pathway |
| 3L | 9368910 | C | G | CG4461  | 5.90E-05 | 0.789 | 0.797 | 0.732 | 0.803 | 6.83E-01 | response to heat                                                                                                                                                                                                                                                                                                                                                                                                                                                                                                                                                                                                                                                                                                                                                                                                                                                                                                                                                                                                                                                                                          |
| 3L | 9575690 | C | T | CG42673 | 1.33E-05 | 0.403 | 0.453 | 0.504 | 0.426 | 1.93E-01 |                                                                                                                                                                                                                                                                                                                                                                                                                                                                                                                                                                                                                                                                                                                                                                                                                                                                                                                                                                                                                                                                                                           |
| 3L | 9593255 | T | A | CG3222  | 1.36E-04 | 0.579 | 0.630 | 0.608 | 0.548 | 5.60E-01 |                                                                                                                                                                                                                                                                                                                                                                                                                                                                                                                                                                                                                                                                                                                                                                                                                                                                                                                                                                                                                                                                                                           |
| 3L | 9769486 | G | T | CG8177  | 1.49E-04 | 0.048 | 0.062 | 0.030 | 0.080 | 8.97E-01 | inorganic anion exchanger activity; anion transport; anion                                                                                                                                                                                                                                                                                                                                                                                                                                                                                                                                                                                                                                                                                                                                                                                                                                                                                                                                                                                                                                                |
| 3L | 1E+07   | T | C | (dpr10) | 5.84E-06 | 0.058 | 0.038 | 0.027 | 0.050 | 3.32E-03 | antipporter activity; integral component of membrane                                                                                                                                                                                                                                                                                                                                                                                                                                                                                                                                                                                                                                                                                                                                                                                                                                                                                                                                                                                                                                                      |
| 3L | 1E+07   | T | G | (dpr10) | 3.31E-05 | 0.056 | 0.041 | 0.027 | 0.052 | 2.28E-03 | NA                                                                                                                                                                                                                                                                                                                                                                                                                                                                                                                                                                                                                                                                                                                                                                                                                                                                                                                                                                                                                                                                                                        |
| 3L | 1E+07   | C | T | A2bp1   | 1.33E-05 | 0.055 | 0.062 | 0.079 | 0.027 | 1.60E-01 | nucleotide binding; mRNA binding; nucleus; cytoplasm; nervous system development; imaginal disc-derived wing vein specification; transcription factor binding; transcription regulatory region DNA binding; positive regulation of transcription                                                                                                                                                                                                                                                                                                                                                                                                                                                                                                                                                                                                                                                                                                                                                                                                                                                          |
| 3L | 1.1E+07 | G | A | (NijA)  | 1.28E-04 | 0.344 | 0.365 | 0.287 | 0.423 | 5.81E-02 | NA                                                                                                                                                                                                                                                                                                                                                                                                                                                                                                                                                                                                                                                                                                                                                                                                                                                                                                                                                                                                                                                                                                        |
| 3L | 1.1E+07 | T | A | (Aps)   | 1.01E-04 | 0.404 | 0.472 | 0.459 | 0.532 | 6.64E-01 | NA                                                                                                                                                                                                                                                                                                                                                                                                                                                                                                                                                                                                                                                                                                                                                                                                                                                                                                                                                                                                                                                                                                        |



|    |         |   |   |           |          |       |       |       |       |          |          |                                                                                                                                                                                                                                                                                                                                                                                                                                                                                    |
|----|---------|---|---|-----------|----------|-------|-------|-------|-------|----------|----------|------------------------------------------------------------------------------------------------------------------------------------------------------------------------------------------------------------------------------------------------------------------------------------------------------------------------------------------------------------------------------------------------------------------------------------------------------------------------------------|
| 3L | 1.1E+07 | G | A | (CG34050) | 5.58E-05 | 0.419 | 0.455 | 0.351 | 0.485 | NA       | NA       | glycosphingolipid biosynthetic process;peripheral nervous system development;glycoprotein biosynthetic process;galactosylgalactosylxylosylprotein 3-beta-glucuronosyltransferase activity;glucuronosyltransferase activity;membrane;proteoglycan biosynthetic process;-N-acetylglucosamine beta-1                                                                                                                                                                                  |
| 3L | 1.1E+07 | T | G | CG7638    | 9.40E-05 | 0.086 | 0.088 | 0.151 | 0.096 | 9.05E-02 |          |                                                                                                                                                                                                                                                                                                                                                                                                                                                                                    |
| 3L | 1.1E+07 | G | A | GLCAT-P   | 1.09E-04 | 0.032 | 0.031 | 0.011 | 0.051 | 6.41E-01 | 6.41E-01 | cell morphogenesis;protein binding;cytoplasm;plasma membrane;learning or memory;long-term memory;olfactory learning;rhodome;protein kinase binding;rhodome development;negative regulation of synaptic growth at neuromuscular junction;cell hair;cell periphery                                                                                                                                                                                                                   |
| 3L | 1.1E+07 | G | A | (CG6168)  | 1.85E-05 | 0.115 | 0.131 | 0.256 | 0.107 | 7.66E-01 | NA       | heart process;transmembrane signaling receptor activity;plasma membrane;integral component of plasma membrane;septate junction;pleated septate junction;establishment or maintenance of cell polarity;dorsal closure;synaptic target recognition;establishment of blood-nerve barrier;protein localization;axon ensheathment;integral component of membrane;synaptic vesicle targeting;synaptic vesicle docking;septate junction assembly;nerve maturation;regulation of tube size |
| 3L | 1.2E+07 | T | C | Mob2      | 9.70E-05 | 0.068 | 0.100 | 0.050 | 0.134 | 9.23E-01 |          |                                                                                                                                                                                                                                                                                                                                                                                                                                                                                    |
| 3L | 1.3E+07 | G | C | sowah     | 5.27E-05 | 0.461 | 0.459 | 0.529 | 0.419 | 9.54E-01 |          |                                                                                                                                                                                                                                                                                                                                                                                                                                                                                    |
| 3L | 1.3E+07 | G | C | CG32111   | 5.53E-05 | 0.076 | 0.032 | 0.052 | 0.026 | 6.34E-01 |          |                                                                                                                                                                                                                                                                                                                                                                                                                                                                                    |
| 3L | 1.3E+07 | C | G | (mir)     | 8.82E-06 | 0.034 | 0.037 | 0.026 | 0.052 | 1.08E-01 | NA       |                                                                                                                                                                                                                                                                                                                                                                                                                                                                                    |
| 3L | 1.3E+07 | C | T | (mir)     | 1.07E-04 | 0.177 | 0.168 | 0.108 | 0.189 | 2.98E-02 | NA       |                                                                                                                                                                                                                                                                                                                                                                                                                                                                                    |
| 3L | 1.3E+07 | G | A | (CG10943) | 7.74E-05 | 0.027 | 0.025 | 0.044 | 0.096 | 6.44E-01 | NA       |                                                                                                                                                                                                                                                                                                                                                                                                                                                                                    |
| 3L | 1.3E+07 | C | T | (CG11262) | 3.30E-05 | 0.557 | 0.539 | 0.443 | 0.588 | NA       | NA       |                                                                                                                                                                                                                                                                                                                                                                                                                                                                                    |
| 3L | 1.3E+07 | T | A | CG17672   | 6.16E-05 | 0.066 | 0.058 | 0.010 | 0.064 | 6.54E-01 |          |                                                                                                                                                                                                                                                                                                                                                                                                                                                                                    |
| 3L | 1.3E+07 | G | A | (CR43913) | 2.79E-05 | 0.215 | 0.249 | 0.142 | 0.272 | 4.10E-01 | NA       |                                                                                                                                                                                                                                                                                                                                                                                                                                                                                    |
| 3L | 1.3E+07 | G | T | (CR43912) | 8.87E-05 | 0.042 | 0.031 | 0.072 | 0.026 | 3.17E-01 | NA       | DNA-binding transcription factor activity;nucleus;regulation of transcription                                                                                                                                                                                                                                                                                                                                                                                                      |
| 3L | 1.4E+07 | A | T | Sox21b    | 1.39E-04 | 0.101 | 0.154 | 0.201 | 0.108 | 8.62E-01 |          |                                                                                                                                                                                                                                                                                                                                                                                                                                                                                    |

|    |         |   |   |            |          |       |       |       |       |          |                                                                                                                                                                         |
|----|---------|---|---|------------|----------|-------|-------|-------|-------|----------|-------------------------------------------------------------------------------------------------------------------------------------------------------------------------|
| 3L | 1.5E+07 | C | A | hbg        | 1.27E-04 | 0.063 | 0.050 | 0.021 | 0.046 | 9.38E-01 | nucleus;plasma membrane;border follicle cell migration;imaginal disc development                                                                                        |
| 3L | 1.5E+07 | C | A | (Boba)     | 1.35E-04 | 0.027 | 0.035 | 0.013 | 0.054 | 8.84E-01 | NA                                                                                                                                                                      |
| 3L | 1.5E+07 | A | T | (Tollo)    | 1.04E-04 | 0.148 | 0.189 | 0.254 | 0.155 | 9.53E-01 | NA                                                                                                                                                                      |
| 3L | 1.5E+07 | A | T | (Tollo)    | 4.77E-05 | 0.141 | 0.188 | 0.222 | 0.126 | 6.97E-01 | NA                                                                                                                                                                      |
| 3L | 1.5E+07 | G | T | (CR43625)  | 1.33E-04 | 0.581 | 0.548 | 0.418 | 0.584 | 8.15E-01 | NA                                                                                                                                                                      |
| 3L | 1.6E+07 | T | C | (CG34451)  | 1.12E-04 | 0.757 | 0.754 | 0.771 | 0.748 | 4.20E-01 | NA                                                                                                                                                                      |
|    |         |   |   |            |          |       |       |       |       |          | protein serine/threonine kinase activity;ATP binding;protein phosphorylation;protein N-linked glycosylation;neuromuscular                                               |
| 3L | 1.6E+07 | C | A | sff        | 8.40E-05 | 0.126 | 0.136 | 0.155 | 0.084 | 8.88E-01 | junction development                                                                                                                                                    |
| 3L | 1.6E+07 | G | T | CG13070    | 9.09E-05 | 0.348 | 0.316 | 0.340 | 0.369 | NA       | NA                                                                                                                                                                      |
|    |         |   |   |            |          |       |       |       |       |          | translation elongation factor activity;GTPase activity;GTP binding;eukaryotic translation initiation factor 2                                                           |
| 3L | 1.6E+07 | C | T | CG33158    | 3.73E-05 | 0.075 | 0.059 | 0.074 | 0.028 | 7.91E-02 | complex;translational elongation                                                                                                                                        |
|    |         |   |   |            |          |       |       |       |       |          | translation elongation factor activity;GTPase activity;GTP binding;eukaryotic translation initiation factor 2                                                           |
| 3L | 1.6E+07 | T | C | CG33158    | 1.21E-05 | 0.077 | 0.061 | 0.077 | 0.029 | 7.77E-02 | binding;eukaryotic translation initiation factor 2                                                                                                                      |
| 3L | 1.8E+07 | G | A | (CG5290)   | 2.51E-05 | 0.194 | 0.174 | 0.209 | 0.130 | 9.54E-04 | NA                                                                                                                                                                      |
| 3L | 1.8E+07 | T | A | (grim)     | 4.02E-05 | 0.958 | 0.951 | 0.971 | 0.939 | 2.89E-01 | NA                                                                                                                                                                      |
| 3L | 1.9E+07 | C | A | (CG32204)  | 1.09E-04 | 0.053 | 0.108 | 0.125 | 0.074 | NA       | NA                                                                                                                                                                      |
| 3L | 1.9E+07 | T | C | (Spn75F)   | 1.33E-04 | 0.039 | 0.047 | 0.071 | 0.023 | 6.55E-02 | NA                                                                                                                                                                      |
|    |         |   |   |            |          |       |       |       |       |          | Wnt:protein binding;Wnt-activated receptor activity;Wnt signaling pathway involved in dorsal/ventral axis                                                               |
| 3L | 1.9E+07 | C | T | CG32206    | 1.26E-04 | 0.077 | 0.082 | 0.056 | 0.029 | 3.16E-01 | specification;lateral inhibition;canonical Wnt signaling pathway                                                                                                        |
|    |         |   |   |            |          |       |       |       |       |          | Rho guanyl-nucleotide exchange factor activity;cell adhesion;imaginal disc-derived leg morphogenesis;regulation of cell shape;positive regulation of Rho protein signal |
| 3L | 2E+07   | A | G | CG42674    | 1.05E-04 | 0.229 | 0.196 | 0.179 | 0.228 | 4.95E-04 | transduction                                                                                                                                                            |
| 3L | 2.1E+07 | A | G | (CR43929)  | 1.52E-04 | 0.136 | 0.103 | 0.177 | 0.096 | 7.73E-01 | NA                                                                                                                                                                      |
| 3L | 2.2E+07 | G | T | (mir-4942) | 5.67E-05 | 0.063 | 0.217 | 0.173 | 0.273 | 2.19E-01 | NA                                                                                                                                                                      |

|    |         |   |   |             |          |       |       |       |       |          |                                                                                                                                                                                                                                                                                                                                                                                                                                                                                                          |
|----|---------|---|---|-------------|----------|-------|-------|-------|-------|----------|----------------------------------------------------------------------------------------------------------------------------------------------------------------------------------------------------------------------------------------------------------------------------------------------------------------------------------------------------------------------------------------------------------------------------------------------------------------------------------------------------------|
| 3L | 2.3E+07 | G | A | alpha-Cat   | 1.33E-04 | 0.026 | 0.025 | 0.091 | 0.052 | 1.58E-01 | actin binding;structural molecule activity;protein binding;plasma membrane;adherens junction;cell-cell adherens junction;spot adherens junction;zonula adherens;cytoskeletal anchoring at plasma membrane;cell adhesion;establishment or maintenance of cell polarity;cytoskeletal protein binding;actin cytoskeleton;catenin complex;cell-substrate junction;oocyte localization involved in germarium-derived egg chamber formation;adherens junction organization;cadherin binding;head morphogenesis |
| 3R | 1262668 | C | A | CG14669     | 4.50E-05 | 0.281 | 0.233 | 0.278 | 0.214 | 1.15E-04 | GTP binding;obsolete GTP catabolic process;small GTPase mediated signal transduction;membrane                                                                                                                                                                                                                                                                                                                                                                                                            |
| 3R | 1892799 | G | T | (CG15580)   | 8.55E-05 | 0.407 | 0.353 | 0.315 | 0.373 | 4.86E-01 | NA                                                                                                                                                                                                                                                                                                                                                                                                                                                                                                       |
| 3R | 2456272 | T | C | sunz        | 1.51E-04 | 0.275 | 0.290 | 0.215 | 0.301 | 3.58E-01 | calcium ion binding;male meiotic nuclear division                                                                                                                                                                                                                                                                                                                                                                                                                                                        |
| 3R | 5950686 | A | G | knk         | 1.22E-04 | 0.053 | 0.116 | 0.156 | 0.079 | 2.48E-04 | embryonic epithelial tube formation;chitin biosynthetic process;cuticle chitin biosynthetic process;terminal region determination;open tracheal system development;torso signaling pathway;chitin-based embryonic cuticle biosynthetic process;regulation of tube size                                                                                                                                                                                                                                   |
| 3R | 6250938 | C | A | (CG6345)    | 8.76E-06 | 0.582 | 0.562 | 0.518 | 0.608 | 2.02E-01 | NA                                                                                                                                                                                                                                                                                                                                                                                                                                                                                                       |
| 3R | 7105520 | G | C | CG31386     | 1.37E-04 | 0.580 | 0.410 | 0.414 | 0.532 | 2.68E-01 | voltage-gated chloride channel activity;chloride channel activity;chloride transport;actin cytoskeleton;membrane;adenyl nucleotide binding;transmembrane transport                                                                                                                                                                                                                                                                                                                                       |
| 3R | 7634750 | G | A | Clc-a       | 2.83E-05 | 0.026 | 0.039 | 0.011 | 0.045 | 4.50E-01 | calcium ion binding;nucleus;cytoplasm;mitochondrion;rough endoplasmic reticulum;rhabdomere;axon;rhabdomere development;cell body;sequestering of calcium ion                                                                                                                                                                                                                                                                                                                                             |
| 3R | 7982089 | G | C | dpr15       | 8.24E-05 | 0.097 | 0.175 | 0.192 | 0.140 | 1.28E-02 | sensory perception of chemical stimulus                                                                                                                                                                                                                                                                                                                                                                                                                                                                  |
| 3R | 7990369 | G | C | Cpn         | 5.55E-05 | 0.041 | 0.056 | 0.055 | 0.013 | 1.65E-01 | development;cell body;sequestering of calcium ion                                                                                                                                                                                                                                                                                                                                                                                                                                                        |
| 3R | 8426065 | G | A | (Octbeta2R) | 5.94E-05 | 0.205 | 0.175 | 0.143 | 0.090 | 1.07E-02 | NA                                                                                                                                                                                                                                                                                                                                                                                                                                                                                                       |
| 3R | 9224993 | T | C | CG9796      | 2.64E-05 | 0.138 | 0.109 | 0.046 | 0.078 | 7.87E-02 |                                                                                                                                                                                                                                                                                                                                                                                                                                                                                                          |

|    |         |   |   |               |          |       |       |       |       |          |                                                                                                                                                                                                                                                                                                                                                                                                                      |
|----|---------|---|---|---------------|----------|-------|-------|-------|-------|----------|----------------------------------------------------------------------------------------------------------------------------------------------------------------------------------------------------------------------------------------------------------------------------------------------------------------------------------------------------------------------------------------------------------------------|
| 3R | 9820259 | C | G | rdx           | 8.81E-05 | 0.261 | 0.267 | 0.263 | 0.189 | 6.85E-01 | protein binding;nucleus;cellularization;protein ubiquitination;regulation of proteolysis;protein destabilization;establishment of ommatidial planar polarity;negative regulation of protein import into nucleus;protein homodimerization activity;positive regulation of apoptotic process;negative regulation of smoothed signaling pathway;positive regulation of JNK cascade;lateral inhibition;eye morphogenesis |
| 3R | 1E+07   | T | C | (cv-c)        | 1.42E-04 | 0.227 | 0.240 | 0.200 | 0.293 | 9.87E-01 | NA                                                                                                                                                                                                                                                                                                                                                                                                                   |
| 3R | 1.1E+07 | A | T | Neu3          | 1.21E-04 | 0.035 | 0.023 | 0.011 | 0.033 | 2.02E-01 | NA                                                                                                                                                                                                                                                                                                                                                                                                                   |
| 3R | 1.1E+07 | T | C | (btsz)        | 1.37E-04 | 0.066 | 0.086 | 0.075 | 0.151 | 4.19E-01 | NA                                                                                                                                                                                                                                                                                                                                                                                                                   |
| 3R | 1.1E+07 | C | A | (CG3837)      | 3.19E-05 | 0.096 | 0.114 | 0.100 | 0.046 | 2.26E-01 | NA                                                                                                                                                                                                                                                                                                                                                                                                                   |
| 3R | 1.1E+07 | T | G | (CG43335)     | 5.07E-05 | 0.433 | 0.596 | 0.672 | 0.554 | 2.38E-02 | NA                                                                                                                                                                                                                                                                                                                                                                                                                   |
| 3R | 1.1E+07 | G | C | (pxb)         | 1.88E-05 | 0.017 | 0.026 | 0.041 | 0.010 | 6.69E-01 | NA                                                                                                                                                                                                                                                                                                                                                                                                                   |
| 3R | 1.2E+07 | C | T | alpha-Man-IIb | 1.16E-04 | 0.078 | 0.093 | 0.132 | 0.089 | 5.63E-01 | Golgi membrane;alpha-mannosidase activity;mannosyl-oligosaccharide 1                                                                                                                                                                                                                                                                                                                                                 |
| 3R | 1.2E+07 | T | G | ss            | 7.25E-05 | 0.081 | 0.084 | 0.054 | 0.107 | 8.52E-05 | negative regulation of transcription by RNA polymerase II;DNA binding;DNA-binding transcription factor activity;NA;obsolete                                                                                                                                                                                                                                                                                          |
| 3R | 1.3E+07 | A | T | msa           | 5.21E-05 | 0.317 | 0.335 | 0.295 | 0.390 | 2.89E-02 | signal transducer activity;nucleus;regulation of transcription                                                                                                                                                                                                                                                                                                                                                       |
| 3R | 1.3E+07 | T | A | (Mur89F)      | 1.47E-04 | 0.030 | 0.066 | 0.097 | 0.027 | NA       | NA                                                                                                                                                                                                                                                                                                                                                                                                                   |
| 3R | 1.3E+07 | C | A | (CG31262)     | 1.33E-04 | 0.298 | 0.230 | 0.175 | 0.293 | 4.45E-01 | NA                                                                                                                                                                                                                                                                                                                                                                                                                   |
| 3R | 1.4E+07 | C | T | CG18012       | 5.36E-06 | 0.270 | 0.296 | 0.311 | 0.225 | 4.68E-03 | protein glycosylation;beta-1                                                                                                                                                                                                                                                                                                                                                                                         |
| 3R | 1.4E+07 | T | C | (htl)         | 1.01E-05 | 0.876 | 0.884 | 0.947 | 0.855 | 4.11E-02 | NA                                                                                                                                                                                                                                                                                                                                                                                                                   |
| 3R | 1.4E+07 | G | A | CG14316       | 3.72E-05 | 0.191 | 0.159 | 0.137 | 0.079 | 7.39E-01 | biological_process                                                                                                                                                                                                                                                                                                                                                                                                   |
| 3R | 1.4E+07 | G | T | CG7156        | 1.25E-04 | 0.085 | 0.150 | 0.130 | 0.189 | 1.57E-04 | protein kinase activity;ATP binding;protein phosphorylation;phosphatidylinositol binding;neuron projection morphogenesis                                                                                                                                                                                                                                                                                             |
| 3R | 1.5E+07 | T | A | CG42613       | 1.55E-05 | 0.193 | 0.248 | 0.300 | 0.245 | NA       | biological_process                                                                                                                                                                                                                                                                                                                                                                                                   |
| 3R | 1.5E+07 | A | G | CG5316        | 1.50E-04 | 0.169 | 0.137 | 0.210 | 0.148 | 8.88E-01 | single strand break repair;mRNA splicing                                                                                                                                                                                                                                                                                                                                                                             |
| 3R | 1.6E+07 | C | T | mun           | 9.40E-05 | 0.389 | 0.394 | 0.300 | 0.412 | 1.39E-01 | transcription regulatory region sequence-specific DNA binding;DNA-binding transcription factor activity;nucleus;regulation of transcription                                                                                                                                                                                                                                                                          |
| 3R | 1.7E+07 | T | G | lbl           | 3.71E-05 | 0.735 | 0.655 | 0.658 | 0.771 | 2.22E-01 | transcription regulatory region sequence-specific DNA binding;DNA-binding transcription factor activity;nucleus;regulation of transcription                                                                                                                                                                                                                                                                          |

|    |         |   |   |           |          |       |       |       |       |          |                                                                                                                                                                                                                                                                                                                                                                                                                                                                                     |                                                                       |
|----|---------|---|---|-----------|----------|-------|-------|-------|-------|----------|-------------------------------------------------------------------------------------------------------------------------------------------------------------------------------------------------------------------------------------------------------------------------------------------------------------------------------------------------------------------------------------------------------------------------------------------------------------------------------------|-----------------------------------------------------------------------|
| 3R | 1.9E+07 | A | G | CG13830   | 1.22E-04 | 0.339 | 0.311 | 0.354 | 0.255 | NA       | calcium ion binding;NA;signal transduction                                                                                                                                                                                                                                                                                                                                                                                                                                          |                                                                       |
| 3R | 1.9E+07 | T | C | CG6763    | 8.94E-05 | 0.552 | 0.532 | 0.493 | 0.684 | 1.49E-02 | metalloendopeptidase activity;proteolysis;zinc ion binding;meprin A complex                                                                                                                                                                                                                                                                                                                                                                                                         |                                                                       |
|    |         |   |   |           |          |       |       |       |       |          | cell morphogenesis;ruffle;protein binding;cytoplasm;cytoskeleton organization;border follicle cell migration;dorsal closure;central nervous system development;skeletal muscle tissue development;myoblast fusion;larval visceral muscle development;muscle attachment;extrinsic component of plasma membrane;actin cytoskeleton organization;Rac guanyl-nucleotide exchange factor activity;NA;cell competition in a multicellular organism;anterior Malpighian tubule development |                                                                       |
| 3R | 2E+07   | A | G | mbc       | 2.21E-05 | 0.795 | 0.713 | 0.741 | 0.645 | NA       | organism;anterior Malpighian tubule development                                                                                                                                                                                                                                                                                                                                                                                                                                     |                                                                       |
| 3R | 2E+07   | T | A | (ESyt2)   | 1.03E-04 | 0.323 | 0.320 | 0.315 | 0.219 | 7.54E-01 | NA                                                                                                                                                                                                                                                                                                                                                                                                                                                                                  | DNA-binding transcription factor activity;regulation of transcription |
| 3R | 2E+07   | G | A | CG13624   | 1.00E-04 | 0.257 | 0.313 | 0.196 | 0.333 | 3.76E-02 | transcription                                                                                                                                                                                                                                                                                                                                                                                                                                                                       |                                                                       |
| 3R | 2.1E+07 | T | A | CG31370   | 4.07E-05 | 0.090 | 0.065 | 0.109 | 0.052 | 7.04E-01 | transferase activity                                                                                                                                                                                                                                                                                                                                                                                                                                                                |                                                                       |
|    |         |   |   |           |          |       |       |       |       |          | mitochondrial envelope;transmembrane transporter                                                                                                                                                                                                                                                                                                                                                                                                                                    |                                                                       |
| 3R | 2.2E+07 | T | A | CG4743    | 1.96E-05 | 0.024 | 0.038 | 0.050 | 0.013 | 2.04E-01 | activity;transmembrane transport                                                                                                                                                                                                                                                                                                                                                                                                                                                    |                                                                       |
| 3R | 2.2E+07 | T | C | malpha    | 8.38E-05 | 0.410 | 0.364 | 0.475 | 0.350 | 1.61E-03 |                                                                                                                                                                                                                                                                                                                                                                                                                                                                                     |                                                                       |
| 3R | 2.2E+07 | C | T | (CG6073)  | 1.15E-04 | 0.371 | 0.418 | 0.368 | 0.473 | 1.04E-01 | NA                                                                                                                                                                                                                                                                                                                                                                                                                                                                                  |                                                                       |
| 3R | 2.2E+07 | T | A | (CG6073)  | 7.44E-05 | 0.371 | 0.415 | 0.368 | 0.476 | 1.55E-01 | NA                                                                                                                                                                                                                                                                                                                                                                                                                                                                                  |                                                                       |
| 3R | 2.3E+07 | G | C | CG14253   | 7.63E-05 | 0.524 | 0.608 | 0.516 | 0.666 | 2.81E-01 |                                                                                                                                                                                                                                                                                                                                                                                                                                                                                     |                                                                       |
| 3R | 2.3E+07 | C | T | CG5611    | 1.09E-04 | 0.142 | 0.186 | 0.070 | 0.200 | 3.39E-01 | metabolic process                                                                                                                                                                                                                                                                                                                                                                                                                                                                   |                                                                       |
| 3R | 2.4E+07 | A | T | CG34353   | 1.51E-04 | 0.086 | 0.095 | 0.180 | 0.091 | 1.99E-01 | gravitaxis                                                                                                                                                                                                                                                                                                                                                                                                                                                                          |                                                                       |
|    |         |   |   |           |          |       |       |       |       |          | polypeptide N-acetylgalactosaminyltransferase activity;Golgi stack;oligosaccharide biosynthetic process;multicellular organism reproduction                                                                                                                                                                                                                                                                                                                                         |                                                                       |
| 3R | 2.5E+07 | G | A | CG10000   | 5.00E-05 | 0.074 | 0.091 | 0.127 | 0.065 | 5.20E-03 | organism reproduction                                                                                                                                                                                                                                                                                                                                                                                                                                                               |                                                                       |
|    |         |   |   |           |          |       |       |       |       |          | polypeptide N-acetylgalactosaminyltransferase activity;Golgi stack;oligosaccharide biosynthetic process;multicellular organism reproduction                                                                                                                                                                                                                                                                                                                                         |                                                                       |
| 3R | 2.5E+07 | C | A | CG10000   | 6.19E-05 | 0.037 | 0.020 | 0.056 | 0.010 | 1.01E-01 | organism reproduction                                                                                                                                                                                                                                                                                                                                                                                                                                                               |                                                                       |
| 3R | 2.5E+07 | G | C | (CG12558) | 1.94E-05 | 0.526 | 0.408 | 0.401 | 0.522 | 2.20E-03 | NA                                                                                                                                                                                                                                                                                                                                                                                                                                                                                  |                                                                       |
| 3R | 2.5E+07 | G | A | CG14521   | 7.81E-05 | 0.052 | 0.033 | 0.012 | 0.049 | 9.35E-01 |                                                                                                                                                                                                                                                                                                                                                                                                                                                                                     |                                                                       |
|    |         |   |   |           |          |       |       |       |       |          | ATP binding;xenobiotic transmembrane transporting ATPase activity;drug transmembrane transporter activity;integral component of membrane;transmembrane transport                                                                                                                                                                                                                                                                                                                    |                                                                       |
| 3R | 2.5E+07 | A | C | CG11897   | 1.48E-04 | 0.469 | 0.474 | 0.421 | 0.526 | 3.50E-01 |                                                                                                                                                                                                                                                                                                                                                                                                                                                                                     |                                                                       |
| 3R | 2.5E+07 | T | A | (Cnx99A)  | 8.52E-05 | 0.082 | 0.083 | 0.037 | 0.110 | 3.16E-01 | NA                                                                                                                                                                                                                                                                                                                                                                                                                                                                                  |                                                                       |

|    |         |   |   |             |          |       |       |       |       |          |                                                                                                                                                                                                                                                                                                                                                                                                                                                                                                                                                                                                                                                                                                                                                                                             |
|----|---------|---|---|-------------|----------|-------|-------|-------|-------|----------|---------------------------------------------------------------------------------------------------------------------------------------------------------------------------------------------------------------------------------------------------------------------------------------------------------------------------------------------------------------------------------------------------------------------------------------------------------------------------------------------------------------------------------------------------------------------------------------------------------------------------------------------------------------------------------------------------------------------------------------------------------------------------------------------|
| 3R | 2.5E+07 | G | C | Dopr2       | 1.43E-04 | 0.486 | 0.539 | 0.491 | 0.625 | 6.78E-01 | mitotic spindle elongation;meiotic spindle organization;microtubule bundle formation;microtubule motor activity;ATP binding;spindle;kinesin complex;minus-end kinesin complex;microtubule-based movement;spindle organization;mitotic spindle organization;spindle assembly involved in female meiosis;chromosome segregation;mitotic centrosome separation;microtubule binding;ATP-dependent microtubule motor activity                                                                                                                                                                                                                                                                                                                                                                    |
| 3R | 2.6E+07 | G | A | ncd         | 1.49E-04 | 0.148 | 0.145 | 0.093 | 0.208 | 3.16E-02 | microtubule motor activity                                                                                                                                                                                                                                                                                                                                                                                                                                                                                                                                                                                                                                                                                                                                                                  |
| 3R | 2.6E+07 | T | C | CG1983      | 1.19E-04 | 0.202 | 0.217 | 0.169 | 0.222 | 1.25E-01 | pyridoxal phosphate binding                                                                                                                                                                                                                                                                                                                                                                                                                                                                                                                                                                                                                                                                                                                                                                 |
| 3R | 2.6E+07 | G | T | hdc         | 1.40E-04 | 0.236 | 0.243 | 0.340 | 0.206 | NA       | cytoplasm;open tracheal system development;terminal branching                                                                                                                                                                                                                                                                                                                                                                                                                                                                                                                                                                                                                                                                                                                               |
| 3R | 2.6E+07 | T | A | PH4alphaEFB | 2.92E-05 | 0.051 | 0.040 | 0.082 | 0.025 | NA       | procollagen-proline 4-dioxygenase activity;iron ion binding;endoplasmic reticulum;procollagen-proline 4-dioxygenase complex;oxidoreductase activity                                                                                                                                                                                                                                                                                                                                                                                                                                                                                                                                                                                                                                         |
| 3R | 2.6E+07 | C | T | (CG31013)   | 2.13E-05 | 0.050 | 0.094 | 0.073 | 0.151 | 1.69E-02 | NA                                                                                                                                                                                                                                                                                                                                                                                                                                                                                                                                                                                                                                                                                                                                                                                          |
| 3R | 2.7E+07 | C | T | (CG15545)   | 2.89E-05 | 0.238 | 0.261 | 0.168 | 0.288 | 1.27E-01 | NA                                                                                                                                                                                                                                                                                                                                                                                                                                                                                                                                                                                                                                                                                                                                                                                          |
| 3R | 2.7E+07 | G | A | (CG12071)   | 2.31E-05 | 0.447 | 0.444 | 0.387 | 0.520 | 6.72E-01 | NA                                                                                                                                                                                                                                                                                                                                                                                                                                                                                                                                                                                                                                                                                                                                                                                          |
| 3R | 2.7E+07 | C | T | (CG15550)   | 1.51E-04 | 0.075 | 0.088 | 0.050 | 0.081 | 3.48E-01 | NA                                                                                                                                                                                                                                                                                                                                                                                                                                                                                                                                                                                                                                                                                                                                                                                          |
| 3R | 2.7E+07 | G | A | CG12054     | 4.54E-05 | 0.061 | 0.046 | 0.028 | 0.060 | 3.03E-02 | nucleic acid binding;metal ion binding                                                                                                                                                                                                                                                                                                                                                                                                                                                                                                                                                                                                                                                                                                                                                      |
| 3R | 2.7E+07 | C | T | (CG1607)    | 2.29E-05 | 0.536 | 0.520 | 0.399 | 0.548 | 5.17E-04 | NA                                                                                                                                                                                                                                                                                                                                                                                                                                                                                                                                                                                                                                                                                                                                                                                          |
| 3R | 2.7E+07 | A | C | Gprk2       | 5.11E-05 | 0.753 | 0.786 | 0.799 | 0.720 | 3.86E-01 | regulation of antimicrobial peptide biosynthetic process;apical constriction involved in gastrulation;protein serine/threonine kinase activity;G protein-coupled receptor kinase activity;ATP binding;cytoplasm;plasma membrane;protein phosphorylation;signal transduction;G protein-coupled receptor signaling pathway;smoothened signaling pathway;vitellogenesis;imaginal disc-derived wing vein specification;regulation of G protein-coupled receptor signaling pathway;regulation of smoothened signaling pathway;regulation of Toll signaling pathway;embryo development;termination of G protein-coupled receptor signaling pathway;positive regulation of cAMP-mediated signaling;negative regulation of smoothened signaling pathway;defense response to Gram-positive bacterium |



|   |         |   |   |           |          |       |       |       |       |          |                                                                                                                                                                                                                                                                                                                                                                                                                                                                                                                                                                                                                             |
|---|---------|---|---|-----------|----------|-------|-------|-------|-------|----------|-----------------------------------------------------------------------------------------------------------------------------------------------------------------------------------------------------------------------------------------------------------------------------------------------------------------------------------------------------------------------------------------------------------------------------------------------------------------------------------------------------------------------------------------------------------------------------------------------------------------------------|
| X | 6549545 | G | A | I(1)G0148 | 1.02E-04 | 0.965 | 0.983 | 0.988 | 0.956 | 7.28E-02 | protein serine/threonine kinase activity;obsolete signal transducer                                                                                                                                                                                                                                                                                                                                                                                                                                                                                                                                                         |
| X | 6689046 | T | C | C3G       | 6.98E-05 | 0.035 | 0.057 | 0.105 | 0.048 | NA       | Ras guanyl-nucleotide exchange factor activity;intracellular;Ras protein signal transduction;somatic muscle development;muscle attachment;Rap guanyl-nucleotide exchange factor activity;NA;sarcomere organization                                                                                                                                                                                                                                                                                                                                                                                                          |
| X | 8907108 | A | G | rdgA      | 1.36E-04 | 0.077 | 0.052 | 0.092 | 0.023 | 4.05E-01 | NAD+ kinase activity;diacylglycerol kinase activity;microtubule associated complex;phosphatidic acid biosynthetic process;phosphatidylinositol biosynthetic process;actin filament organization;protein kinase C-activating G protein-coupled receptor signaling pathway;visual perception;phototransduction;sensory perception of sound;sensory perception of smell;metabolic process;membrane;rhodopsin mediated signaling pathway;deactivation of rhodopsin mediated signaling;phosphorylation;diacylglycerol binding;intracellular signal transduction;thermotaxis;photoreceptor cell maintenance;lipid phosphorylation |
| X | 8907110 | T | C | rdgA      | 8.00E-05 | 0.062 | 0.053 | 0.092 | 0.023 | 3.89E-01 | NAD+ kinase activity;diacylglycerol kinase activity;microtubule associated complex;phosphatidic acid biosynthetic process;phosphatidylinositol biosynthetic process;actin filament organization;protein kinase C-activating G protein-coupled receptor signaling pathway;visual perception;phototransduction;sensory perception of sound;sensory perception of smell;metabolic process;membrane;rhodopsin mediated signaling pathway;deactivation of rhodopsin mediated signaling;phosphorylation;diacylglycerol binding;intracellular signal transduction;thermotaxis;photoreceptor cell maintenance;lipid phosphorylation |







| chr | pos      | ref | alt | gene                 | p.At_Lb  | p.ci     | concord | afMean |        |       | GO terms |                                                                                                                                                                                                                                                                                                                                                                                                                                                                                                         |
|-----|----------|-----|-----|----------------------|----------|----------|---------|--------|--------|-------|----------|---------------------------------------------------------------------------------------------------------------------------------------------------------------------------------------------------------------------------------------------------------------------------------------------------------------------------------------------------------------------------------------------------------------------------------------------------------------------------------------------------------|
|     |          |     |     |                      |          |          |         | er     | .No-Ad | .At   |          | .Lb                                                                                                                                                                                                                                                                                                                                                                                                                                                                                                     |
| 2L  | 9209955  | G   | C   | tai                  | 6.31E-03 | 9.50E-09 | FALSE   | 0.033  | 0.034  | 0.021 | 0.052    | nucleus;regulation of transcription; DNA-templated;border follicle cell migration;nuclear receptor binding;nuclear receptor transcription coactivator activity;cellular response to hormone stimulus;nuclear hormone receptor binding;steroid hormone receptor binding;positive regulation of growth;positive regulation of transcription by RNA polymerase II;protein dimerization activity;axon extension;germ-line stem-cell niche homeostasis;positive regulation of border follicle cell migration |
| 2L  | 14353549 | G   | T   | I(2)34Fd<br>(CG1446) | 7.46E-03 | 3.53E-09 | TRUE    | 0.159  | 0.209  | 0.247 | 0.185    | maturaton of SSU-rRNA from tricistronic rRNA transcript;nucleolus;small-subunit processome                                                                                                                                                                                                                                                                                                                                                                                                              |
| 2R  | 738754   | G   | A   | 4)                   | 6.47E-03 | 8.21E-12 | FALSE   | 0.844  | 0.723  | 0.702 | 0.650    | NA                                                                                                                                                                                                                                                                                                                                                                                                                                                                                                      |
| 3R  | 10964114 | G   | A   | CG3984               | 2.28E-03 | 1.45E-09 | TRUE    | 0.231  | 0.187  | 0.267 | 0.210    | NA                                                                                                                                                                                                                                                                                                                                                                                                                                                                                                      |
| 3R  | 12086524 | G   | C   | (tara)<br>(tRNA:CR)  | 7.86E-03 | 4.97E-10 | FALSE   | 0.342  | 0.363  | 0.326 | 0.402    | NA                                                                                                                                                                                                                                                                                                                                                                                                                                                                                                      |
| 3R  | 12254580 | G   | T   | 31497)               | 5.88E-03 | 1.21E-10 | TRUE    | 0.073  | 0.115  | 0.121 | 0.047    | NA                                                                                                                                                                                                                                                                                                                                                                                                                                                                                                      |

---

|    |          |   |   |      |          |          |      |       |       |       |       |                                                                                                                                                                                                                                                                                                                                                                                                                                            |
|----|----------|---|---|------|----------|----------|------|-------|-------|-------|-------|--------------------------------------------------------------------------------------------------------------------------------------------------------------------------------------------------------------------------------------------------------------------------------------------------------------------------------------------------------------------------------------------------------------------------------------------|
| 3R | 12275145 | A | T | Pak3 | 4.01E-03 | 7.48E-10 | TRUE | 0.044 | 0.053 | 0.065 | 0.021 | activity;ATP binding;cytoplasm;protein phosphorylation;actin filament organization;myoblast fusion;cell migration;signal transduction by protein phosphorylation;stress-activated protein kinase signaling<br>cascade;activation of protein kinase activity;protein homodimerization activity;regulation of MAPK cascade;protein autophosphorylation;Rac GTPase binding;regulation of axonogenesis;positive regulation of synapse assembly |
|----|----------|---|---|------|----------|----------|------|-------|-------|-------|-------|--------------------------------------------------------------------------------------------------------------------------------------------------------------------------------------------------------------------------------------------------------------------------------------------------------------------------------------------------------------------------------------------------------------------------------------------|

---

|    |          |   |   |         |          |          |      |       |       |                                          |       |                                           |
|----|----------|---|---|---------|----------|----------|------|-------|-------|------------------------------------------|-------|-------------------------------------------|
|    |          |   |   |         |          |          |      |       |       | transcription regulatory region          |       |                                           |
|    |          |   |   |         |          |          |      |       |       | sequence-specific DNA binding; RNA       |       |                                           |
|    |          |   |   |         |          |          |      |       |       | polymerase II distal enhancer sequence-  |       |                                           |
|    |          |   |   |         |          |          |      |       |       | specific DNA binding;pole cell           |       |                                           |
|    |          |   |   |         |          |          |      |       |       | migration;segment                        |       |                                           |
|    |          |   |   |         |          |          |      |       |       | specification;specification of segmental |       |                                           |
|    |          |   |   |         |          |          |      |       |       | identity; abdomen;open tracheal          |       |                                           |
|    |          |   |   |         |          |          |      |       |       | system development;salivary gland        |       |                                           |
|    |          |   |   |         |          |          |      |       |       | development;imaginal disc-derived        |       |                                           |
|    |          |   |   |         |          |          |      |       |       | genitalia development;midgut             |       |                                           |
|    |          |   |   |         |          |          |      |       |       | development;gonadal mesoderm             |       |                                           |
|    |          |   |   |         |          |          |      |       |       | development;heart development;sex        |       |                                           |
|    |          |   |   |         |          |          |      |       |       | differentiation;negative regulation of   |       |                                           |
|    |          |   |   |         |          |          |      |       |       | female receptivity;germ cell             |       |                                           |
|    |          |   |   |         |          |          |      |       |       | migration;male gonad                     |       |                                           |
|    |          |   |   |         |          |          |      |       |       | development;negative regulation of       |       |                                           |
|    |          |   |   |         |          |          |      |       |       | cardioblast cell fate specification;male |       |                                           |
|    |          |   |   |         |          |          |      |       |       | genitalia development;female genitalia   |       |                                           |
|    |          |   |   |         |          |          |      |       |       | development;genital disc                 |       |                                           |
|    |          |   |   |         |          |          |      |       |       | development;genital disc                 |       |                                           |
|    |          |   |   |         |          |          |      |       |       | anterior/posterior pattern               |       |                                           |
|    |          |   |   |         |          |          |      |       |       | formation;determination of genital disc  |       |                                           |
|    |          |   |   |         |          |          |      |       |       | primordium;external genitalia            |       |                                           |
|    |          |   |   |         |          |          |      |       |       | morphogenesis;genital disc sexually      |       |                                           |
|    |          |   |   |         |          |          |      |       |       | dimorphic development;spiracle           |       |                                           |
|    |          |   |   |         |          |          |      |       |       | morphogenesis; open tracheal             |       |                                           |
|    |          |   |   |         |          |          |      |       |       | system;negative regulation of salivary   |       |                                           |
| 3R | 12787654 | T | G | Abd-B   | 1.04E-03 | 7.47E-09 | TRUE | 0.168 | 0.152 | 0.166                                    | 0.081 | <b>actin binding</b> ;plasma membrane;Rho |
| 3R | 12811795 | T | C | CG18622 | 1.52E-03 | 6.40E-09 | TRUE | 0.027 | 0.046 | 0.064                                    | 0.033 | protein signal transduction;Rac guanyl-   |
|    |          |   |   |         |          |          |      |       |       |                                          |       | nucleotide exchange factor                |
|    |          |   |   |         |          |          |      |       |       |                                          |       | activity;regulation of Rho protein signal |
|    |          |   |   |         |          |          |      |       |       |                                          |       | transduction;olfactory                    |
|    |          |   |   |         |          |          |      |       |       |                                          |       | behavior;synapse                          |
| 3R | 12835934 | T | C | CG8907  | 6.88E-03 | 3.48E-09 | TRUE | 0.444 | 0.403 | 0.439                                    | 0.319 |                                           |

|    |          |   |   |         |          |          |      |       |       |       |       |                                                                                                                                                                                                                                                                                                                                                                                                                                                                                                                                                                                                             |
|----|----------|---|---|---------|----------|----------|------|-------|-------|-------|-------|-------------------------------------------------------------------------------------------------------------------------------------------------------------------------------------------------------------------------------------------------------------------------------------------------------------------------------------------------------------------------------------------------------------------------------------------------------------------------------------------------------------------------------------------------------------------------------------------------------------|
| 3R | 12900510 | G | A | Keap1   | 9.85E-03 | 3.82E-13 | TRUE | 0.134 | 0.187 | 0.252 | 0.155 | actin binding;nucleus;polytene<br>chromosome puff;response to oxidative<br>stress;protein homodimerization<br>activity;protein autoubiquitination                                                                                                                                                                                                                                                                                                                                                                                                                                                           |
| 3R | 12900525 | G | T | Keap1   | 2.81E-03 | 5.17E-13 | TRUE | 0.130 | 0.192 | 0.249 | 0.166 | actin binding;nucleus;polytene<br>chromosome puff;response to oxidative<br>stress;protein homodimerization<br>activity;protein autoubiquitination                                                                                                                                                                                                                                                                                                                                                                                                                                                           |
| 3R | 12922911 | T | A | cher    | 5.58E-03 | 4.38E-09 | TRUE | 0.692 | 0.696 | 0.615 | 0.685 | mitotic cell cycle;actin binding;actin<br>filament;actin assembly;actin<br>cytoskeleton;female germline ring<br>canal formation;cytoplasmic<br>transport;nurse cell to oocyte;long-term<br>memory;motor neuron axon<br>guidance;protein<br>localization;determination of adult<br>lifespan;Z disc;germarium-derived<br>female germ-line cyst<br>encapsulation;negative regulation of<br>lamellocyte differentiation;apical<br>cortex;sarcomere<br>organization;behavioral response to<br>ethanol;perinuclear region of<br>cytoplasm;positive regulation of<br>cytoskeleton organization;contractile<br>ring |
| 3R | 12950403 | T | C | 9)      | 2.55E-03 | 1.50E-09 | TRUE | 0.030 | 0.055 | 0.072 | 0.024 | NA                                                                                                                                                                                                                                                                                                                                                                                                                                                                                                                                                                                                          |
| 3R | 13636748 | A | G | CG18012 | 2.09E-03 | 1.70E-10 | TRUE | 0.074 | 0.065 | 0.094 | 0.046 |                                                                                                                                                                                                                                                                                                                                                                                                                                                                                                                                                                                                             |
| 3R | 14009775 | C | T | CG7208  | 2.11E-04 | 5.70E-14 | TRUE | 0.064 | 0.068 | 0.073 | 0.026 |                                                                                                                                                                                                                                                                                                                                                                                                                                                                                                                                                                                                             |
| 3R | 14193535 | C | T | Nup43   | 4.48E-03 | 4.42E-09 | TRUE | 0.074 | 0.086 | 0.111 | 0.035 | mitotic cell cycle;nuclear pore outer ring                                                                                                                                                                                                                                                                                                                                                                                                                                                                                                                                                                  |

|    |          |   |   |         |          |          |      |       |       |       |       |                                                                                                                                                                                                                                                                                                                                                             |
|----|----------|---|---|---------|----------|----------|------|-------|-------|-------|-------|-------------------------------------------------------------------------------------------------------------------------------------------------------------------------------------------------------------------------------------------------------------------------------------------------------------------------------------------------------------|
| 3R | 14490730 | C | A | Gos28   | 5.01E-03 | 2.66E-10 | TRUE | 0.066 | 0.069 | 0.124 | 0.085 | Golgi trans cisterna;Golgi membrane;SNAP receptor activity;Golgi medial cisterna;cis-Golgi network;endoplasmic reticulum to Golgi vesicle-mediated transport;intra-Golgi vesicle-mediated transport;vesicle fusion;membrane;integral component of membrane;vesicle-mediated transport;SNARE complex;Golgi vesicle transport;regulation of vesicle targeting |
| 3R | 14647260 | T | G | CG18208 | 4.06E-03 | 3.99E-10 | TRUE | 0.091 | 0.135 | 0.162 | 0.119 |                                                                                                                                                                                                                                                                                                                                                             |
| 3R | 15874531 | T | A | CG17193 | 1.24E-03 | 4.96E-09 | TRUE | 0.220 | 0.258 | 0.339 | 0.239 |                                                                                                                                                                                                                                                                                                                                                             |
| 3R | 16514202 | T | A | (Oamb)  | 3.77E-03 | 2.35E-09 | TRUE | 0.138 | 0.150 | 0.213 | 0.086 | NA                                                                                                                                                                                                                                                                                                                                                          |
| 3R | 17066761 | A | T | (e)     | 3.25E-03 | 3.04E-11 | TRUE | 0.197 | 0.222 | 0.237 | 0.131 | NA                                                                                                                                                                                                                                                                                                                                                          |
| 3R | 17941912 | T | A | lr94b   | 6.93E-03 | 3.80E-09 | TRUE | 0.045 | 0.067 | 0.065 | 0.028 | detection of chemical stimulus;ligand-gated ion channel activity;integral component of membrane                                                                                                                                                                                                                                                             |

---

3R 19013520 T A cnc 8.34E-03 2.39E-09 TRUE 0.050 0.057 0.062 0.014

---

DNA binding; DNA-binding transcription factor activity; nucleus; polytene chromosome puff; response to oxidative stress; oocyte dorsal/ventral axis specification; regulation of pole plasm oskar mRNA localization; blastoderm segmentation; oocyte microtubule cytoskeleton  
polarization; determination of adult lifespan; regulation of bicoid mRNA localization; response to endoplasmic reticulum stress; intestinal stem cell homeostasis; bicoid mRNA localization; pole plasm oskar mRNA localization; positive regulation of transcription by RNA polymerase II; protein heterodimerization activity; dendrite morphogenesis; oocyte nucleus localization involved in oocyte dorsal/ventral axis specification; head development; pharynx development



|    |          |   |   |        |          |          |      |       |       |       |       |                                                                                                                                                                                                                                                                                                                                                                                                                                                                                                                                                           |
|----|----------|---|---|--------|----------|----------|------|-------|-------|-------|-------|-----------------------------------------------------------------------------------------------------------------------------------------------------------------------------------------------------------------------------------------------------------------------------------------------------------------------------------------------------------------------------------------------------------------------------------------------------------------------------------------------------------------------------------------------------------|
| 3R | 19696100 | T | A | Pli    | 2.67E-03 | 7.07E-09 | TRUE | 0.059 | 0.078 | 0.111 | 0.046 | protein polyubiquitination; positive regulation of antimicrobial peptide production; ubiquitin-protein transferase activity; protein binding; cytosol; Toll signaling pathway; cytoplasmic side of plasma membrane; kinase regulator activity; innate immune response; negative regulation of Toll signaling pathway; positive regulation of Toll signaling pathway; ubiquitin protein ligase activity; protein K48-linked ubiquitination; negative regulation of defense response to bacterium; negative regulation of antifungal innate immune response |
| 3R | 19965402 | A | C | Npc2f  | 1.01E-03 | 1.15E-12 | TRUE | 0.028 | 0.030 | 0.055 | 0.025 | sterol transport; intracellular cholesterol transport; sterol binding                                                                                                                                                                                                                                                                                                                                                                                                                                                                                     |
| 3R | 19979636 | C | T | CG6178 | 2.40E-03 | 4.06E-12 | TRUE | 0.039 | 0.062 | 0.078 | 0.026 | long-chain fatty acid metabolic process; fatty-acyl-CoA synthase activity; long-chain fatty acid-CoA ligase activity; peroxisome; fatty acid biosynthetic process; acyl-CoA metabolic process; fatty acid ligase activity; CoA-ligase activity; luciferin monooxygenase activity; fatty-acyl-CoA biosynthetic process                                                                                                                                                                                                                                     |
| 3R | 19979912 | G | A | CG6178 | 2.16E-03 | 9.63E-11 | TRUE | 0.044 | 0.065 | 0.073 | 0.029 | long-chain fatty acid metabolic process; fatty-acyl-CoA synthase activity; long-chain fatty acid-CoA ligase activity; peroxisome; fatty acid biosynthetic process; acyl-CoA metabolic process; fatty acid ligase activity; CoA-ligase activity; luciferin monooxygenase activity; fatty-acyl-CoA biosynthetic process                                                                                                                                                                                                                                     |
| 3R | 20077768 | A | G | CG5706 | 8.69E-03 | 1.59E-12 | TRUE | 0.076 | 0.096 | 0.097 | 0.054 |                                                                                                                                                                                                                                                                                                                                                                                                                                                                                                                                                           |

|    |          |   |   |         |          |          |       |       |       |       |       |                                                                                                                                                                                  |
|----|----------|---|---|---------|----------|----------|-------|-------|-------|-------|-------|----------------------------------------------------------------------------------------------------------------------------------------------------------------------------------|
| 3R | 20165522 | G | A | CG6432  | 6.77E-03 | 6.70E-11 | FALSE | 0.477 | 0.412 | 0.379 | 0.498 | catalytic activity;fatty acid biosynthetic process;short-chain fatty acid-CoA ligase activity                                                                                    |
| 3R | 20165558 | C | G | CG6432  | 2.18E-03 | 4.17E-11 | FALSE | 0.457 | 0.465 | 0.454 | 0.533 | catalytic activity;fatty acid biosynthetic process;short-chain fatty acid-CoA ligase activity                                                                                    |
| 3R | 20341694 | C | T | CG13617 | 6.59E-03 | 1.47E-09 | TRUE  | 0.044 | 0.063 | 0.071 | 0.020 | nucleic acid binding;cytoplasm;ciliary basal body;cilium assembly                                                                                                                |
|    |          |   |   |         |          |          |       |       |       |       |       | metalloendopeptidase activity;calcium ion binding;axon guidance;defasciculation of motor neuron axon;motor neuron axon guidance;zinc ion binding;imaginal disc-derived wing vein |
| 3R | 20570027 | T | G | tok     | 4.36E-03 | 1.74E-11 | TRUE  | 0.246 | 0.347 | 0.350 | 0.211 | morphogenesis;negative regulation of gene expression;protein processing                                                                                                          |
| 3R | 20653990 | G | T | (niki)  | 5.51E-03 | 9.57E-11 | FALSE | 0.053 | 0.058 | 0.034 | 0.084 | NA                                                                                                                                                                               |
|    |          |   |   |         |          |          |       |       |       |       |       | metalloendopeptidase activity;proteolysis;metallopeptidase activity;integral component of membrane                                                                               |
| 3R | 22886860 | G | T | Nept5   | 3.52E-03 | 2.54E-09 | FALSE | 0.413 | 0.437 | 0.403 | 0.448 |                                                                                                                                                                                  |
